# Supplementary material
Source: publisher figshare collection journal article supplement (https://acs.figshare.com/ndownloader/files/4048444)
Supplement: Supplementary file 1 [file 4048444]

## Sheet: Peptides
Supplementary Table 2A: Peptide list of SSO1273 protein cleaved by Chymotripsin/Trypsin (merged results of three independent nano-RP-HPLC-ESI-MS/MS experiments)
m/z measured	z	Peptide Start	Peptide End	Mw (expt )	Mw (calc)	error (ppm)	Number of miss cleavage	Peptide sequence	Modification	Ions Score
833.912	2	31	47	1665.81	1665.81	0	0	QSASSSPASTAITIISY.N	Gln->pyro-Glu (N-term Q)	27.28
833.912	2	31	47	1665.81	1665.81	0	0	QSASSSPASTAITIISY.N	Gln->pyro-Glu (N-term Q)	27.28
833.915	2	31	47	1665.82	1665.81	4	0	QSASSSPASTAITIISY.N	Gln->pyro-Glu (N-term Q)	30.51
833.915	2	31	47	1665.82	1665.81	4	0	QSASSSPASTAITIISY.N	Gln->pyro-Glu (N-term Q)	30.51
833.915	2	31	47	1665.82	1665.81	4	0	QSASSSPASTAITIISY.N	Gln->pyro-Glu (N-term Q)	30.51
833.918	2	31	47	1665.82	1665.81	7	0	QSASSSPASTAITIISY.N	Gln->pyro-Glu (N-term Q)	21.09
833.918	2	31	47	1665.82	1665.81	7	0	QSASSSPASTAITIISY.N	Gln->pyro-Glu (N-term Q)	21.09
833.918	2	31	47	1665.82	1665.81	7	0	QSASSSPASTAITIISY.N	Gln->pyro-Glu (N-term Q)	21.09
833.92	2	31	47	1665.83	1665.81	9	0	QSASSSPASTAITIISY.N	Gln->pyro-Glu (N-term Q)	26.92
833.92	2	31	47	1665.83	1665.81	9	0	QSASSSPASTAITIISY.N	Gln->pyro-Glu (N-term Q)	26.92
833.92	2	31	47	1665.83	1665.81	9	0	QSASSSPASTAITIISY.N	Gln->pyro-Glu (N-term Q)	26.92
833.932	2	31	47	1665.85	1665.81	24	0	QSASSSPASTAITIISY.N	Gln->pyro-Glu (N-term Q)	52.35
833.932	2	31	47	1665.85	1665.81	24	0	QSASSSPASTAITIISY.N	Gln->pyro-Glu (N-term Q)	52.35
842.432	2	31	47	1682.85	1682.84	7	0	QSASSSPASTAITIISY.N		27.88
842.432	2	31	47	1682.85	1682.84	7	0	QSASSSPASTAITIISY.N		27.88
842.432	2	31	47	1682.85	1682.84	7	0	QSASSSPASTAITIISY.N		27.88
842.437	2	31	47	1682.86	1682.84	14	0	QSASSSPASTAITIISY.N		28.85
842.437	2	31	47	1682.86	1682.84	14	0	QSASSSPASTAITIISY.N		28.85
842.438	2	31	47	1682.86	1682.84	15	0	QSASSSPASTAITIISY.N		47.3
842.438	2	31	47	1682.86	1682.84	15	0	QSASSSPASTAITIISY.N		47.3
553.269	2	48	58	1104.52	1104.52	3	1	Y.NGNDANGILAF.E		28
553.269	2	48	58	1104.52	1104.52	3	1	Y.NGNDANGILAF.E		28
553.269	2	48	58	1104.52	1104.52	3	1	Y.NGNDANGILAF.E		28
553.274	2	48	58	1104.53	1104.52	12	1	Y.NGNDANGILAF.E		26
553.274	2	48	58	1104.53	1104.52	12	1	Y.NGNDANGILAF.E		26
553.274	2	48	58	1104.53	1104.52	12	1	Y.NGNDANGILAF.E		26
944.459	2	48	65	1886.9	1886.89	7	2	Y.NGNDANGILAFEHGQIAF.Y		28
944.459	2	48	65	1886.9	1886.89	7	2	Y.NGNDANGILAFEHGQIAF.Y		28
944.459	2	48	65	1886.9	1886.89	7	2	Y.NGNDANGILAFEHGQIAF.Y		28
591.783	2	57	66	1181.55	1181.55	1	2	L.AFEHGQIAFY.A		41
591.783	2	57	66	1181.55	1181.55	1	2	L.AFEHGQIAFY.A		41
591.783	2	57	66	1181.55	1181.55	1	2	L.AFEHGQIAFY.A		41
591.785	2	57	66	1181.55	1181.55	3	2	L.AFEHGQIAFY.A		45
591.785	2	57	66	1181.55	1181.55	3	2	L.AFEHGQIAFY.A		45
591.787	2	57	66	1181.56	1181.55	7	2	L.AFEHGQIAFY.A		35
591.787	2	57	66	1181.56	1181.55	7	2	L.AFEHGQIAFY.A		35
591.787	2	57	66	1181.56	1181.55	7	2	L.AFEHGQIAFY.A		35
591.787	2	57	66	1181.56	1181.55	7	2	L.AFEHGQIAFY.A		39
591.787	2	57	66	1181.56	1181.55	7	2	L.AFEHGQIAFY.A		39
591.787	2	57	66	1181.56	1181.55	7	2	L.AFEHGQIAFY.A		39
591.796	2	57	66	1181.58	1181.55	23	2	L.AFEHGQIAFY.A		28
591.796	2	57	66	1181.58	1181.55	23	2	L.AFEHGQIAFY.A		28
482.731	2	59	66	963.447	963.445	3	1	F.EHGQIAFY.A		20
482.731	2	59	66	963.447	963.445	3	1	F.EHGQIAFY.A		20
482.734	2	59	66	963.454	963.445	9	1	F.EHGQIAFY.A		31
482.734	2	59	66	963.454	963.445	9	1	F.EHGQIAFY.A		31
482.734	2	59	66	963.454	963.445	9	1	F.EHGQIAFY.A		31
482.737	2	59	66	963.459	963.445	14	1	F.EHGQIAFY.A		42
482.737	2	59	66	963.459	963.445	14	1	F.EHGQIAFY.A		42
482.737	2	59	66	963.459	963.445	14	1	F.EHGQIAFY.A		27
482.737	2	59	66	963.459	963.445	14	1	F.EHGQIAFY.A		27
482.737	2	59	66	963.459	963.445	15	1	F.EHGQIAFY.A		31
482.737	2	59	66	963.459	963.445	15	1	F.EHGQIAFY.A		31
482.737	2	59	66	963.459	963.445	15	1	F.EHGQIAFY.A		31
482.739	2	59	66	963.463	963.445	19	1	F.EHGQIAFY.A		25
482.739	2	59	66	963.463	963.445	19	1	F.EHGQIAFY.A		25
482.739	2	59	66	963.463	963.445	19	1	F.EHGQIAFY.A		25
482.739	2	59	66	963.463	963.445	19	1	F.EHGQIAFY.A		36
482.739	2	59	66	963.463	963.445	19	1	F.EHGQIAFY.A		36
482.739	2	59	66	963.463	963.445	19	1	F.EHGQIAFY.A		36
482.739	2	59	66	963.463	963.445	19	1	F.EHGQIAFY.A		36
482.739	2	59	66	963.463	963.445	19	1	F.EHGQIAFY.A		34
482.739	2	59	66	963.463	963.445	19	1	F.EHGQIAFY.A		34
482.739	2	59	66	963.463	963.445	19	1	F.EHGQIAFY.A		39
482.739	2	59	66	963.463	963.445	19	1	F.EHGQIAFY.A		39
482.739	2	59	66	963.463	963.445	19	1	F.EHGQIAFY.A		35
482.739	2	59	66	963.463	963.445	19	1	F.EHGQIAFY.A		35
482.739	2	59	66	963.463	963.445	19	1	F.EHGQIAFY.A		39
482.739	2	59	66	963.463	963.445	19	1	F.EHGQIAFY.A		39
482.739	2	59	66	963.463	963.445	19	1	F.EHGQIAFY.A		35
482.739	2	59	66	963.463	963.445	19	1	F.EHGQIAFY.A		35
482.739	2	59	66	963.463	963.445	19	1	F.EHGQIAFY.A		32
482.739	2	59	66	963.463	963.445	19	1	F.EHGQIAFY.A		32
482.74	2	59	66	963.464	963.445	20	1	F.EHGQIAFY.A		34
482.74	2	59	66	963.464	963.445	20	1	F.EHGQIAFY.A		34
482.741	2	59	66	963.467	963.445	23	1	F.EHGQIAFY.A		28
482.741	2	59	66	963.467	963.445	23	1	F.EHGQIAFY.A		28
482.741	2	59	66	963.467	963.445	23	1	F.EHGQIAFY.A		30
482.741	2	59	66	963.467	963.445	23	1	F.EHGQIAFY.A		30
482.741	2	59	66	963.467	963.445	23	1	F.EHGQIAFY.A		44
482.741	2	59	66	963.467	963.445	23	1	F.EHGQIAFY.A		44
482.741	2	59	66	963.467	963.445	23	1	F.EHGQIAFY.A		23
482.741	2	59	66	963.467	963.445	23	1	F.EHGQIAFY.A		23
482.741	2	59	66	963.467	963.445	23	1	F.EHGQIAFY.A		22
482.741	2	59	66	963.467	963.445	23	1	F.EHGQIAFY.A		22
482.743	2	59	66	963.471	963.445	27	1	F.EHGQIAFY.A		21
482.743	2	59	66	963.471	963.445	27	1	F.EHGQIAFY.A		21
482.744	2	59	66	963.473	963.445	29	1	F.EHGQIAFY.A		30
482.744	2	59	66	963.473	963.445	29	1	F.EHGQIAFY.A		30
580.271	2	66	75	1158.53	1158.52	4	2	F.YAYAVPPSEY.T		34
580.271	2	66	75	1158.53	1158.52	4	2	F.YAYAVPPSEY.T		34
580.271	2	66	75	1158.53	1158.52	4	2	F.YAYAVPPSEY.T		34
580.271	2	66	75	1158.53	1158.52	4	2	F.YAYAVPPSEY.T		29
580.271	2	66	75	1158.53	1158.52	4	2	F.YAYAVPPSEY.T		29
580.271	2	66	75	1158.53	1158.52	4	2	F.YAYAVPPSEY.T		29
580.272	2	66	75	1158.53	1158.52	6	2	F.YAYAVPPSEY.T		22
580.272	2	66	75	1158.53	1158.52	6	2	F.YAYAVPPSEY.T		22
580.273	2	66	75	1158.53	1158.52	8	2	F.YAYAVPPSEY.T		36
580.273	2	66	75	1158.53	1158.52	8	2	F.YAYAVPPSEY.T		36
580.274	2	66	75	1158.53	1158.52	9	2	F.YAYAVPPSEY.T		21
580.274	2	66	75	1158.53	1158.52	9	2	F.YAYAVPPSEY.T		21
580.274	2	66	75	1158.53	1158.52	9	2	F.YAYAVPPSEY.T		21
580.279	2	66	75	1158.54	1158.52	17	2	F.YAYAVPPSEY.T		22
580.279	2	66	75	1158.54	1158.52	17	2	F.YAYAVPPSEY.T		22
580.279	2	66	75	1158.54	1158.52	17	2	F.YAYAVPPSEY.T		22
955.978	2	66	83	1909.94	1909.95	-3	3	F.YAYAVPPSEYTSLPPGAK.A		25
637.66	3	66	83	1909.96	1909.95	6	3	F.YAYAVPPSEYTSLPPGAK.A		27
955.993	2	66	83	1909.97	1909.95	13	3	F.YAYAVPPSEYTSLPPGAK.A		31
498.737	2	67	75	995.46	995.46	0	1	Y.AYAVPPSEY.T		30
498.737	2	67	75	995.46	995.46	0	1	Y.AYAVPPSEY.T		30
498.737	2	67	75	995.46	995.46	0	1	Y.AYAVPPSEY.T		30
498.738	2	67	75	995.462	995.46	2	1	Y.AYAVPPSEY.T		30
498.738	2	67	75	995.462	995.46	2	1	Y.AYAVPPSEY.T		30
498.738	2	67	75	995.462	995.46	2	1	Y.AYAVPPSEY.T		30
498.74	2	67	75	995.464	995.46	4	1	Y.AYAVPPSEY.T		27
498.74	2	67	75	995.464	995.46	4	1	Y.AYAVPPSEY.T		27
498.74	2	67	75	995.464	995.46	4	1	Y.AYAVPPSEY.T		27
498.74	2	67	75	995.465	995.46	5	1	Y.AYAVPPSEY.T		22
498.74	2	67	75	995.465	995.46	5	1	Y.AYAVPPSEY.T		22
498.74	2	67	75	995.465	995.46	5	1	Y.AYAVPPSEY.T		22
498.74	2	67	75	995.465	995.46	5	1	Y.AYAVPPSEY.T		22
498.741	2	67	75	995.467	995.46	7	1	Y.AYAVPPSEY.T		30
498.741	2	67	75	995.467	995.46	7	1	Y.AYAVPPSEY.T		30
498.741	2	67	75	995.467	995.46	7	1	Y.AYAVPPSEY.T		30
498.741	2	67	75	995.467	995.46	7	1	Y.AYAVPPSEY.T		30
498.742	2	67	75	995.469	995.46	9	1	Y.AYAVPPSEY.T		21
498.742	2	67	75	995.469	995.46	9	1	Y.AYAVPPSEY.T		21
498.742	2	67	75	995.469	995.46	9	1	Y.AYAVPPSEY.T		21
498.742	2	67	75	995.469	995.46	9	1	Y.AYAVPPSEY.T		33
498.742	2	67	75	995.469	995.46	9	1	Y.AYAVPPSEY.T		33
498.745	2	67	75	995.476	995.46	16	1	Y.AYAVPPSEY.T		27
498.745	2	67	75	995.476	995.46	16	1	Y.AYAVPPSEY.T		27
498.745	2	67	75	995.476	995.46	16	1	Y.AYAVPPSEY.T		27
498.745	2	67	75	995.476	995.46	16	1	Y.AYAVPPSEY.T		23
498.745	2	67	75	995.476	995.46	16	1	Y.AYAVPPSEY.T		23
498.745	2	67	75	995.476	995.46	16	1	Y.AYAVPPSEY.T		23
498.747	2	67	75	995.48	995.46	20	1	Y.AYAVPPSEY.T		37
498.747	2	67	75	995.48	995.46	20	1	Y.AYAVPPSEY.T		37
498.747	2	67	75	995.48	995.46	20	1	Y.AYAVPPSEY.T		37
498.748	2	67	75	995.481	995.46	21	1	Y.AYAVPPSEY.T		27
498.748	2	67	75	995.481	995.46	21	1	Y.AYAVPPSEY.T		27
874.447	2	67	83	1746.88	1746.88	-2	2	Y.AYAVPPSEYTSLPPGAK.A		25
381.692	2	69	75	761.37	761.36	13	0	Y.AVPPSEY.T		21
381.692	2	69	75	761.37	761.36	13	0	Y.AVPPSEY.T		21
757.399	2	69	83	1512.78	1512.78	0	1	Y.AVPPSEYTSLPPGAK.A		30
757.41	2	69	83	1512.81	1512.78	15	1	Y.AVPPSEYTSLPPGAK.A		25
505.303	3	69	83	1512.89	1512.78	70	1	Y.AVPPSEYTSLPPGAK.A		21
505.303	3	69	83	1512.89	1512.78	70	1	Y.AVPPSEYTSLPPGAK.A		22
502.773	2	76	85	1003.53	1003.53	-2	1	Y.TSLPPGAKAY.L		20
502.773	2	76	85	1003.53	1003.53	-2	1	Y.TSLPPGAKAY.L		20
502.773	2	76	85	1003.53	1003.53	-2	1	Y.TSLPPGAKAY.L		20
502.773	2	76	85	1003.53	1003.53	-2	1	Y.TSLPPGAKAY.L		42
502.773	2	76	85	1003.53	1003.53	-2	1	Y.TSLPPGAKAY.L		42
502.773	2	76	85	1003.53	1003.53	-2	1	Y.TSLPPGAKAY.L		42
502.775	2	76	85	1003.54	1003.53	2	1	Y.TSLPPGAKAY.L		28
502.775	2	76	85	1003.54	1003.53	2	1	Y.TSLPPGAKAY.L		28
502.775	2	76	85	1003.54	1003.53	2	1	Y.TSLPPGAKAY.L		28
502.776	2	76	85	1003.54	1003.53	3	1	Y.TSLPPGAKAY.L		43
502.776	2	76	85	1003.54	1003.53	3	1	Y.TSLPPGAKAY.L		43
502.776	2	76	85	1003.54	1003.53	3	1	Y.TSLPPGAKAY.L		30
502.776	2	76	85	1003.54	1003.53	3	1	Y.TSLPPGAKAY.L		30
502.776	2	76	85	1003.54	1003.53	3	1	Y.TSLPPGAKAY.L		27
502.776	2	76	85	1003.54	1003.53	3	1	Y.TSLPPGAKAY.L		27
502.777	2	76	85	1003.54	1003.53	5	1	Y.TSLPPGAKAY.L		45
502.777	2	76	85	1003.54	1003.53	5	1	Y.TSLPPGAKAY.L		45
502.777	2	76	85	1003.54	1003.53	5	1	Y.TSLPPGAKAY.L		23
502.777	2	76	85	1003.54	1003.53	5	1	Y.TSLPPGAKAY.L		23
502.778	2	76	85	1003.54	1003.53	7	1	Y.TSLPPGAKAY.L		29
502.778	2	76	85	1003.54	1003.53	7	1	Y.TSLPPGAKAY.L		29
502.778	2	76	85	1003.54	1003.53	8	1	Y.TSLPPGAKAY.L		29
502.778	2	76	85	1003.54	1003.53	8	1	Y.TSLPPGAKAY.L		29
502.778	2	76	85	1003.54	1003.53	8	1	Y.TSLPPGAKAY.L		29
502.779	2	76	85	1003.54	1003.53	9	1	Y.TSLPPGAKAY.L		31
502.779	2	76	85	1003.54	1003.53	9	1	Y.TSLPPGAKAY.L		31
502.779	2	76	85	1003.54	1003.53	9	1	Y.TSLPPGAKAY.L		27
502.779	2	76	85	1003.54	1003.53	9	1	Y.TSLPPGAKAY.L		27
502.779	2	76	85	1003.54	1003.53	9	1	Y.TSLPPGAKAY.L		20
502.779	2	76	85	1003.54	1003.53	9	1	Y.TSLPPGAKAY.L		20
502.779	2	76	85	1003.54	1003.53	9	1	Y.TSLPPGAKAY.L		28
502.779	2	76	85	1003.54	1003.53	9	1	Y.TSLPPGAKAY.L		28
502.779	2	76	85	1003.54	1003.53	9	1	Y.TSLPPGAKAY.L		24
502.779	2	76	85	1003.54	1003.53	9	1	Y.TSLPPGAKAY.L		24
502.779	2	76	85	1003.54	1003.53	9	1	Y.TSLPPGAKAY.L		35
502.779	2	76	85	1003.54	1003.53	9	1	Y.TSLPPGAKAY.L		35
502.779	2	76	85	1003.54	1003.53	9	1	Y.TSLPPGAKAY.L		27
502.779	2	76	85	1003.54	1003.53	9	1	Y.TSLPPGAKAY.L		27
502.779	2	76	85	1003.54	1003.53	10	1	Y.TSLPPGAKAY.L		31
502.779	2	76	85	1003.54	1003.53	10	1	Y.TSLPPGAKAY.L		31
502.779	2	76	85	1003.54	1003.53	10	1	Y.TSLPPGAKAY.L		31
502.779	2	76	85	1003.54	1003.53	10	1	Y.TSLPPGAKAY.L		20
502.779	2	76	85	1003.54	1003.53	10	1	Y.TSLPPGAKAY.L		20
502.779	2	76	85	1003.54	1003.53	10	1	Y.TSLPPGAKAY.L		20
502.781	2	76	85	1003.55	1003.53	13	1	Y.TSLPPGAKAY.L		36
502.781	2	76	85	1003.55	1003.53	13	1	Y.TSLPPGAKAY.L		36
502.781	2	76	85	1003.55	1003.53	13	1	Y.TSLPPGAKAY.L		27
502.781	2	76	85	1003.55	1003.53	13	1	Y.TSLPPGAKAY.L		27
502.781	2	76	85	1003.55	1003.53	14	1	Y.TSLPPGAKAY.L		30
502.781	2	76	85	1003.55	1003.53	14	1	Y.TSLPPGAKAY.L		30
502.781	2	76	85	1003.55	1003.53	14	1	Y.TSLPPGAKAY.L		30
502.781	2	76	85	1003.55	1003.53	14	1	Y.TSLPPGAKAY.L		41
502.781	2	76	85	1003.55	1003.53	14	1	Y.TSLPPGAKAY.L		41
502.781	2	76	85	1003.55	1003.53	14	1	Y.TSLPPGAKAY.L		41
502.781	2	76	85	1003.55	1003.53	14	1	Y.TSLPPGAKAY.L		30
502.781	2	76	85	1003.55	1003.53	14	1	Y.TSLPPGAKAY.L		30
502.781	2	76	85	1003.55	1003.53	14	1	Y.TSLPPGAKAY.L		30
502.782	2	76	85	1003.55	1003.53	15	1	Y.TSLPPGAKAY.L		43
502.782	2	76	85	1003.55	1003.53	15	1	Y.TSLPPGAKAY.L		43
502.782	2	76	85	1003.55	1003.53	15	1	Y.TSLPPGAKAY.L		43
502.783	2	76	85	1003.55	1003.53	18	1	Y.TSLPPGAKAY.L		38
502.783	2	76	85	1003.55	1003.53	18	1	Y.TSLPPGAKAY.L		38
502.783	2	76	85	1003.55	1003.53	18	1	Y.TSLPPGAKAY.L		38
502.783	2	76	85	1003.55	1003.53	18	1	Y.TSLPPGAKAY.L		37
502.783	2	76	85	1003.55	1003.53	18	1	Y.TSLPPGAKAY.L		37
502.783	2	76	85	1003.55	1003.53	18	1	Y.TSLPPGAKAY.L		37
502.783	2	76	85	1003.55	1003.53	18	1	Y.TSLPPGAKAY.L		22
502.783	2	76	85	1003.55	1003.53	18	1	Y.TSLPPGAKAY.L		22
502.786	2	76	85	1003.56	1003.53	23	1	Y.TSLPPGAKAY.L		24
502.786	2	76	85	1003.56	1003.53	23	1	Y.TSLPPGAKAY.L		24
502.786	2	76	85	1003.56	1003.53	23	1	Y.TSLPPGAKAY.L		25
502.786	2	76	85	1003.56	1003.53	23	1	Y.TSLPPGAKAY.L		25
360.702	2	86	91	719.39	719.385	6	1	Y.LLPNTY.Y		26
360.702	2	86	91	719.39	719.385	6	1	Y.LLPNTY.Y		26
360.703	2	86	91	719.392	719.385	10	1	Y.LLPNTY.Y		24
360.703	2	86	91	719.392	719.385	10	1	Y.LLPNTY.Y		24
360.703	2	86	91	719.392	719.385	10	1	Y.LLPNTY.Y		24
360.705	2	86	91	719.395	719.385	13	1	Y.LLPNTY.Y		25
360.705	2	86	91	719.395	719.385	13	1	Y.LLPNTY.Y		25
403.74	2	109	114	805.465	805.408	71	1	F.QFQEVR.F		30
403.741	2	109	114	805.467	805.408	73	1	F.QFQEVR.F		24
477.246	2	109	115	952.477	952.477	0	2	F.QFQEVRF.A		30
477.246	2	109	115	952.477	952.477	0	2	F.QFQEVRF.A		30
477.246	2	109	115	952.477	952.477	0	2	F.QFQEVRF.A		30
477.248	2	109	115	952.481	952.477	5	2	F.QFQEVRF.A		29
477.248	2	109	115	952.481	952.477	5	2	F.QFQEVRF.A		29
477.248	2	109	115	952.481	952.477	5	2	F.QFQEVRF.A		29
477.248	2	109	115	952.482	952.477	6	2	F.QFQEVRF.A		23
477.248	2	109	115	952.482	952.477	6	2	F.QFQEVRF.A		23
477.248	2	109	115	952.482	952.477	6	2	F.QFQEVRF.A		21
477.248	2	109	115	952.482	952.477	6	2	F.QFQEVRF.A		21
477.249	2	109	115	952.483	952.477	7	2	F.QFQEVRF.A		31
477.249	2	109	115	952.483	952.477	7	2	F.QFQEVRF.A		31
477.249	2	109	115	952.484	952.477	8	2	F.QFQEVRF.A		32
477.249	2	109	115	952.484	952.477	8	2	F.QFQEVRF.A		32
477.249	2	109	115	952.484	952.477	8	2	F.QFQEVRF.A		32
477.25	2	109	115	952.486	952.477	10	2	F.QFQEVRF.A		33
477.25	2	109	115	952.486	952.477	10	2	F.QFQEVRF.A		33
477.25	2	109	115	952.486	952.477	10	2	F.QFQEVRF.A		33
477.25	2	109	115	952.486	952.477	10	2	F.QFQEVRF.A		27
477.25	2	109	115	952.486	952.477	10	2	F.QFQEVRF.A		27
477.251	2	109	115	952.487	952.477	11	2	F.QFQEVRF.A		35
477.251	2	109	115	952.487	952.477	11	2	F.QFQEVRF.A		35
477.251	2	109	115	952.487	952.477	11	2	F.QFQEVRF.A		35
477.251	2	109	115	952.487	952.477	11	2	F.QFQEVRF.A		32
477.251	2	109	115	952.487	952.477	11	2	F.QFQEVRF.A		32
477.251	2	109	115	952.487	952.477	11	2	F.QFQEVRF.A		32
477.251	2	109	115	952.487	952.477	11	2	F.QFQEVRF.A		35
477.251	2	109	115	952.487	952.477	11	2	F.QFQEVRF.A		35
477.252	2	109	115	952.49	952.477	14	2	F.QFQEVRF.A		36
477.252	2	109	115	952.49	952.477	14	2	F.QFQEVRF.A		36
477.252	2	109	115	952.49	952.477	14	2	F.QFQEVRF.A		36
477.252	2	109	115	952.49	952.477	15	2	F.QFQEVRF.A		36
477.252	2	109	115	952.49	952.477	15	2	F.QFQEVRF.A		36
477.252	2	109	115	952.49	952.477	15	2	F.QFQEVRF.A		29
477.252	2	109	115	952.49	952.477	15	2	F.QFQEVRF.A		29
477.252	2	109	115	952.49	952.477	15	2	F.QFQEVRF.A		45
477.252	2	109	115	952.49	952.477	15	2	F.QFQEVRF.A		45
477.252	2	109	115	952.49	952.477	15	2	F.QFQEVRF.A		24
477.252	2	109	115	952.49	952.477	15	2	F.QFQEVRF.A		24
477.252	2	109	115	952.49	952.477	15	2	F.QFQEVRF.A		25
477.252	2	109	115	952.49	952.477	15	2	F.QFQEVRF.A		25
477.252	2	109	115	952.49	952.477	15	2	F.QFQEVRF.A		45
477.252	2	109	115	952.49	952.477	15	2	F.QFQEVRF.A		45
477.253	2	109	115	952.491	952.477	15	2	F.QFQEVRF.A		25
477.253	2	109	115	952.491	952.477	15	2	F.QFQEVRF.A		25
477.253	2	109	115	952.491	952.477	15	2	F.QFQEVRF.A		35
477.253	2	109	115	952.491	952.477	15	2	F.QFQEVRF.A		35
477.254	2	109	115	952.494	952.477	18	2	F.QFQEVRF.A		31
477.255	2	109	115	952.495	952.477	19	2	F.QFQEVRF.A		34
477.255	2	109	115	952.495	952.477	19	2	F.QFQEVRF.A		34
477.255	2	109	115	952.495	952.477	19	2	F.QFQEVRF.A		34
477.255	2	109	115	952.495	952.477	19	2	F.QFQEVRF.A		35
477.255	2	109	115	952.495	952.477	19	2	F.QFQEVRF.A		35
477.255	2	109	115	952.495	952.477	19	2	F.QFQEVRF.A		36
477.255	2	109	115	952.495	952.477	19	2	F.QFQEVRF.A		36
477.255	2	109	115	952.495	952.477	19	2	F.QFQEVRF.A		35
477.255	2	109	115	952.495	952.477	19	2	F.QFQEVRF.A		35
477.255	2	109	115	952.495	952.477	19	2	F.QFQEVRF.A		22
477.255	2	109	115	952.495	952.477	19	2	F.QFQEVRF.A		22
477.255	2	109	115	952.495	952.477	19	2	F.QFQEVRF.A		34
477.255	2	109	115	952.495	952.477	19	2	F.QFQEVRF.A		34
477.255	2	109	115	952.495	952.477	19	2	F.QFQEVRF.A		35
477.255	2	109	115	952.495	952.477	19	2	F.QFQEVRF.A		35
477.255	2	109	115	952.495	952.477	19	2	F.QFQEVRF.A		29
477.255	2	109	115	952.495	952.477	19	2	F.QFQEVRF.A		29
477.255	2	109	115	952.495	952.477	19	2	F.QFQEVRF.A		24
477.255	2	109	115	952.495	952.477	19	2	F.QFQEVRF.A		24
477.255	2	109	115	952.496	952.477	20	2	F.QFQEVRF.A		35
477.255	2	109	115	952.496	952.477	20	2	F.QFQEVRF.A		35
477.257	2	109	115	952.499	952.477	23	2	F.QFQEVRF.A		23
477.257	2	109	115	952.499	952.477	23	2	F.QFQEVRF.A		23
477.257	2	109	115	952.499	952.477	23	2	F.QFQEVRF.A		21
477.257	2	109	115	952.499	952.477	23	2	F.QFQEVRF.A		21
477.257	2	109	115	952.499	952.477	23	2	F.QFQEVRF.A		21
477.257	2	109	115	952.499	952.477	23	2	F.QFQEVRF.A		21
477.257	2	109	115	952.5	952.477	25	2	F.QFQEVRF.A		24
477.257	2	109	115	952.5	952.477	25	2	F.QFQEVRF.A		24
477.262	2	109	115	952.509	952.477	33	2	F.QFQEVRF.A		22
477.262	2	109	115	952.509	952.477	33	2	F.QFQEVRF.A		22
569.307	2	109	117	1136.6	1136.6	1	3	F.QFQEVRFAL.N		29
569.307	2	109	117	1136.6	1136.6	1	3	F.QFQEVRFAL.N		29
347.204	2	126	131	692.394	692.375	28	1	Y.FVDSIL.H		21
347.204	2	126	131	692.394	692.375	28	1	Y.FVDSIL.H		21
525.763	2	126	134	1049.51	1049.52	-7	2	Y.FVDSILHGY.G		42
525.763	2	126	134	1049.51	1049.52	-7	2	Y.FVDSILHGY.G		42
525.765	2	126	134	1049.52	1049.52	-3	2	Y.FVDSILHGY.G		26
525.765	2	126	134	1049.52	1049.52	-3	2	Y.FVDSILHGY.G		26
525.767	2	126	134	1049.52	1049.52	2	2	Y.FVDSILHGY.G		27
525.767	2	126	134	1049.52	1049.52	2	2	Y.FVDSILHGY.G		27
525.768	2	126	134	1049.52	1049.52	3	2	Y.FVDSILHGY.G		46
525.768	2	126	134	1049.52	1049.52	3	2	Y.FVDSILHGY.G		46
525.768	2	126	134	1049.52	1049.52	3	2	Y.FVDSILHGY.G		46
525.769	2	126	134	1049.52	1049.52	5	2	Y.FVDSILHGY.G		33
525.769	2	126	134	1049.52	1049.52	5	2	Y.FVDSILHGY.G		33
525.77	2	126	134	1049.53	1049.52	7	2	Y.FVDSILHGY.G		46
525.77	2	126	134	1049.53	1049.52	7	2	Y.FVDSILHGY.G		46
525.77	2	126	134	1049.53	1049.52	7	2	Y.FVDSILHGY.G		46
525.772	2	126	134	1049.53	1049.52	10	2	Y.FVDSILHGY.G		40
525.772	2	126	134	1049.53	1049.52	10	2	Y.FVDSILHGY.G		40
525.772	2	126	134	1049.53	1049.52	10	2	Y.FVDSILHGY.G		43
525.772	2	126	134	1049.53	1049.52	10	2	Y.FVDSILHGY.G		43
525.772	2	126	134	1049.53	1049.52	11	2	Y.FVDSILHGY.G		42
525.772	2	126	134	1049.53	1049.52	11	2	Y.FVDSILHGY.G		42
525.772	2	126	134	1049.53	1049.52	11	2	Y.FVDSILHGY.G		42
525.772	2	126	134	1049.53	1049.52	11	2	Y.FVDSILHGY.G		43
525.772	2	126	134	1049.53	1049.52	11	2	Y.FVDSILHGY.G		43
525.772	2	126	134	1049.53	1049.52	11	2	Y.FVDSILHGY.G		43
525.778	2	126	134	1049.54	1049.52	23	2	Y.FVDSILHGY.G		25
525.778	2	126	134	1049.54	1049.52	23	2	Y.FVDSILHGY.G		25
525.78	2	126	134	1049.55	1049.52	27	2	Y.FVDSILHGY.G		43
525.78	2	126	134	1049.55	1049.52	27	2	Y.FVDSILHGY.G		43
525.78	2	126	134	1049.55	1049.52	27	2	Y.FVDSILHGY.G		59
525.78	2	126	134	1049.55	1049.52	27	2	Y.FVDSILHGY.G		59
525.783	2	126	134	1049.55	1049.52	31	2	Y.FVDSILHGY.G		48
525.783	2	126	134	1049.55	1049.52	31	2	Y.FVDSILHGY.G		48
452.233	2	127	134	902.452	902.45	3	1	F.VDSILHGY.G		28
452.233	2	127	134	902.452	902.45	3	1	F.VDSILHGY.G		28
452.233	2	127	134	902.452	902.45	3	1	F.VDSILHGY.G		28
452.234	2	127	134	902.453	902.45	4	1	F.VDSILHGY.G		23
452.234	2	127	134	902.453	902.45	4	1	F.VDSILHGY.G		23
452.235	2	127	134	902.456	902.45	7	1	F.VDSILHGY.G		24
452.235	2	127	134	902.456	902.45	7	1	F.VDSILHGY.G		24
452.235	2	127	134	902.456	902.45	7	1	F.VDSILHGY.G		24
452.236	2	127	134	902.457	902.45	7	1	F.VDSILHGY.G		51
452.236	2	127	134	902.457	902.45	7	1	F.VDSILHGY.G		51
452.236	2	127	134	902.457	902.45	7	1	F.VDSILHGY.G		51
452.236	2	127	134	902.457	902.45	8	1	F.VDSILHGY.G		33
452.236	2	127	134	902.457	902.45	8	1	F.VDSILHGY.G		33
452.236	2	127	134	902.457	902.45	8	1	F.VDSILHGY.G		33
452.238	2	127	134	902.462	902.45	14	1	F.VDSILHGY.G		35
452.238	2	127	134	902.462	902.45	14	1	F.VDSILHGY.G		35
452.238	2	127	134	902.462	902.45	14	1	F.VDSILHGY.G		35
452.238	2	127	134	902.462	902.45	14	1	F.VDSILHGY.G		30
452.238	2	127	134	902.462	902.45	14	1	F.VDSILHGY.G		30
452.241	2	127	134	902.468	902.45	20	1	F.VDSILHGY.G		27
452.241	2	127	134	902.468	902.45	20	1	F.VDSILHGY.G		27
452.243	2	127	134	902.472	902.45	25	1	F.VDSILHGY.G		44
452.243	2	127	134	902.472	902.45	25	1	F.VDSILHGY.G		44
874.456	2	127	142	1746.9	1746.92	-12	3	F.VDSILHGYGIPTISLY.A		20
874.456	2	127	142	1746.9	1746.92	-12	3	F.VDSILHGYGIPTISLY.A		20
874.456	2	127	142	1746.9	1746.92	-12	3	F.VDSILHGYGIPTISLY.A		20
610.819	2	132	142	1219.62	1219.62	0	2	L.HGYGIPTISLY.A		23
610.819	2	132	142	1219.62	1219.62	0	2	L.HGYGIPTISLY.A		23
475.758	2	143	151	949.502	949.487	16	0	Y.AGEPDVIHL.Q		23
475.758	2	143	151	949.502	949.487	16	0	Y.AGEPDVIHL.Q		23
475.763	2	143	151	949.512	949.487	26	0	Y.AGEPDVIHL.Q		26
475.763	2	143	151	949.512	949.487	26	0	Y.AGEPDVIHL.Q		26
710.873	2	143	155	1419.73	1419.74	-3	1	Y.AGEPDVIHLQQTL.S		30
710.873	2	143	155	1419.73	1419.74	-3	1	Y.AGEPDVIHLQQTL.S		30
710.873	2	143	155	1419.73	1419.74	-3	1	Y.AGEPDVIHLQQTL.S		30
710.874	2	143	155	1419.73	1419.74	-1	1	Y.AGEPDVIHLQQTL.S		31
710.874	2	143	155	1419.73	1419.74	-1	1	Y.AGEPDVIHLQQTL.S		31
710.874	2	143	155	1419.73	1419.74	-1	1	Y.AGEPDVIHLQQTL.S		26
710.874	2	143	155	1419.73	1419.74	-1	1	Y.AGEPDVIHLQQTL.S		26
710.876	2	143	155	1419.74	1419.74	1	1	Y.AGEPDVIHLQQTL.S		30
710.876	2	143	155	1419.74	1419.74	1	1	Y.AGEPDVIHLQQTL.S		30
710.876	2	143	155	1419.74	1419.74	1	1	Y.AGEPDVIHLQQTL.S		30
710.877	2	143	155	1419.74	1419.74	2	1	Y.AGEPDVIHLQQTL.S		23
710.877	2	143	155	1419.74	1419.74	2	1	Y.AGEPDVIHLQQTL.S		23
710.877	2	143	155	1419.74	1419.74	2	1	Y.AGEPDVIHLQQTL.S		35
710.877	2	143	155	1419.74	1419.74	2	1	Y.AGEPDVIHLQQTL.S		35
710.877	2	143	155	1419.74	1419.74	2	1	Y.AGEPDVIHLQQTL.S		21
710.877	2	143	155	1419.74	1419.74	2	1	Y.AGEPDVIHLQQTL.S		21
710.877	2	143	155	1419.74	1419.74	2	1	Y.AGEPDVIHLQQTL.S		37
710.877	2	143	155	1419.74	1419.74	2	1	Y.AGEPDVIHLQQTL.S		37
710.877	2	143	155	1419.74	1419.74	2	1	Y.AGEPDVIHLQQTL.S		33
710.877	2	143	155	1419.74	1419.74	2	1	Y.AGEPDVIHLQQTL.S		33
710.879	2	143	155	1419.74	1419.74	5	1	Y.AGEPDVIHLQQTL.S		21
710.879	2	143	155	1419.74	1419.74	5	1	Y.AGEPDVIHLQQTL.S		21
710.879	2	143	155	1419.74	1419.74	5	1	Y.AGEPDVIHLQQTL.S		21
710.879	2	143	155	1419.74	1419.74	6	1	Y.AGEPDVIHLQQTL.S		24
710.879	2	143	155	1419.74	1419.74	6	1	Y.AGEPDVIHLQQTL.S		24
710.879	2	143	155	1419.74	1419.74	6	1	Y.AGEPDVIHLQQTL.S		33
710.879	2	143	155	1419.74	1419.74	6	1	Y.AGEPDVIHLQQTL.S		33
710.879	2	143	155	1419.74	1419.74	6	1	Y.AGEPDVIHLQQTL.S		26
710.879	2	143	155	1419.74	1419.74	6	1	Y.AGEPDVIHLQQTL.S		26
710.881	2	143	155	1419.75	1419.74	9	1	Y.AGEPDVIHLQQTL.S		21
710.881	2	143	155	1419.75	1419.74	9	1	Y.AGEPDVIHLQQTL.S		21
710.881	2	143	155	1419.75	1419.74	9	1	Y.AGEPDVIHLQQTL.S		21
710.882	2	143	155	1419.75	1419.74	9	1	Y.AGEPDVIHLQQTL.S		23
710.882	2	143	155	1419.75	1419.74	9	1	Y.AGEPDVIHLQQTL.S		23
710.882	2	143	155	1419.75	1419.74	9	1	Y.AGEPDVIHLQQTL.S		23
710.884	2	143	155	1419.75	1419.74	13	1	Y.AGEPDVIHLQQTL.S		35
710.884	2	143	155	1419.75	1419.74	13	1	Y.AGEPDVIHLQQTL.S		35
710.89	2	143	155	1419.76	1419.74	20	1	Y.AGEPDVIHLQQTL.S		20
710.89	2	143	155	1419.76	1419.74	20	1	Y.AGEPDVIHLQQTL.S		20
545.962	3	143	157	1634.86	1634.86	1	2	Y.AGEPDVIHLQQTLSK.Y		29
600.323	3	143	158	1797.95	1797.93	11	3	Y.AGEPDVIHLQQTLSKY.A		36
600.323	3	143	158	1797.95	1797.93	11	3	Y.AGEPDVIHLQQTLSKY.A		36
600.323	3	143	158	1797.95	1797.93	11	3	Y.AGEPDVIHLQQTLSKY.A		36
544.32	2	174	183	1086.63	1086.62	7	3	Y.KVLTAHGAKY.I		50
544.32	2	174	183	1086.63	1086.62	7	3	Y.KVLTAHGAKY.I		50
544.32	2	174	183	1086.63	1086.62	7	3	Y.KVLTAHGAKY.I		50
390.695	2	184	189	779.375	779.36	19	1	Y.INGQWY.Y		23
390.695	2	184	189	779.375	779.36	19	1	Y.INGQWY.Y		23
390.695	2	184	189	779.375	779.36	19	1	Y.INGQWY.Y		23
527.784	2	190	198	1053.55	1053.55	3	1	Y.YNGKPITVY.V		33
527.784	2	190	198	1053.55	1053.55	3	1	Y.YNGKPITVY.V		33
527.784	2	190	198	1053.55	1053.55	3	1	Y.YNGKPITVY.V		33
527.784	2	190	198	1053.55	1053.55	5	1	Y.YNGKPITVY.V		22
527.784	2	190	198	1053.55	1053.55	5	1	Y.YNGKPITVY.V		22
527.784	2	190	198	1053.55	1053.55	5	1	Y.YNGKPITVY.V		22
527.789	2	190	198	1053.56	1053.55	13	1	Y.YNGKPITVY.V		31
527.789	2	190	198	1053.56	1053.55	13	1	Y.YNGKPITVY.V		31
527.789	2	190	198	1053.56	1053.55	13	1	Y.YNGKPITVY.V		31
495.805	2	215	222	989.595	989.591	4	3	Y.FITQLQKL.G		35
495.805	2	215	222	989.595	989.591	4	3	Y.FITQLQKL.G		35
495.808	2	215	222	989.602	989.591	11	3	Y.FITQLQKL.G		34
495.808	2	215	222	989.602	989.591	11	3	Y.FITQLQKL.G		34
495.808	2	215	222	989.602	989.591	11	3	Y.FITQLQKL.G		34
495.808	2	215	222	989.602	989.591	12	3	Y.FITQLQKL.G		32
495.808	2	215	222	989.602	989.591	12	3	Y.FITQLQKL.G		32
495.808	2	215	222	989.602	989.591	12	3	Y.FITQLQKL.G		32
422.266	2	216	222	842.517	842.523	-6	2	F.ITQLQKL.G		29
422.266	2	216	222	842.517	842.523	-6	2	F.ITQLQKL.G		29
422.27	2	216	222	842.525	842.523	3	2	F.ITQLQKL.G		27
422.27	2	216	222	842.525	842.523	3	2	F.ITQLQKL.G		27
422.273	2	216	222	842.532	842.523	11	2	F.ITQLQKL.G		29
422.273	2	216	222	842.532	842.523	11	2	F.ITQLQKL.G		29
422.273	2	216	222	842.532	842.523	11	2	F.ITQLQKL.G		29
422.275	2	216	222	842.535	842.523	14	2	F.ITQLQKL.G		34
422.275	2	216	222	842.535	842.523	14	2	F.ITQLQKL.G		34
422.275	2	216	222	842.536	842.523	16	2	F.ITQLQKL.G		32
422.275	2	216	222	842.536	842.523	16	2	F.ITQLQKL.G		32
422.275	2	216	222	842.536	842.523	16	2	F.ITQLQKL.G		32
422.277	2	216	222	842.54	842.523	21	2	F.ITQLQKL.G		30
422.277	2	216	222	842.54	842.523	21	2	F.ITQLQKL.G		30
422.277	2	216	222	842.54	842.523	21	2	F.ITQLQKL.G		30
524.313	2	216	224	1046.61	1046.61	0	3	F.ITQLQKLGF.T		32
524.313	2	216	224	1046.61	1046.61	0	3	F.ITQLQKLGF.T		32
524.319	2	216	224	1046.62	1046.61	10	3	F.ITQLQKLGF.T		32
524.319	2	216	224	1046.62	1046.61	10	3	F.ITQLQKLGF.T		32
524.319	2	216	224	1046.62	1046.61	10	3	F.ITQLQKLGF.T		32
787.436	2	222	235	1572.86	1572.86	-4	3	K.LGFTVQQIQGNLQK.E		26
787.438	2	222	235	1572.86	1572.86	0	3	K.LGFTVQQIQGNLQK.E		38
787.44	2	222	235	1572.87	1572.86	2	3	K.LGFTVQQIQGNLQK.E		69
787.441	2	222	235	1572.87	1572.86	3	3	K.LGFTVQQIQGNLQK.E		33
787.445	2	222	235	1572.87	1572.86	8	3	K.LGFTVQQIQGNLQK.E		36
787.445	2	222	235	1572.88	1572.86	8	3	K.LGFTVQQIQGNLQK.E		58
787.445	2	222	235	1572.88	1572.86	8	3	K.LGFTVQQIQGNLQK.E		22
787.451	2	222	235	1572.89	1572.86	16	3	K.LGFTVQQIQGNLQK.E		21
787.452	2	222	235	1572.89	1572.86	17	3	K.LGFTVQQIQGNLQK.E		27
525.314	2	222	235	1572.92	1572.86	36	3	K.LGFTVQQIQGNLQK.E		38
525.315	2	222	235	1572.92	1572.86	39	3	K.LGFTVQQIQGNLQK.E		20
525.316	2	222	235	1572.93	1572.86	40	3	K.LGFTVQQIQGNLQK.E		35
525.321	2	222	235	1572.94	1572.86	50	3	K.LGFTVQQIQGNLQK.E		46
525.321	2	222	235	1572.94	1572.86	50	3	K.LGFTVQQIQGNLQK.E		31
787.479	2	222	235	1572.94	1572.86	52	3	K.LGFTVQQIQGNLQK.E		60
525.332	2	222	235	1572.97	1572.86	70	3	K.LGFTVQQIQGNLQK.E		40
525.333	2	222	235	1572.98	1572.86	73	3	K.LGFTVQQIQGNLQK.E		43
500.777	2	225	233	999.539	999.535	4	0	F.TVQQIQGNL.Q		30
500.777	2	225	233	999.539	999.535	4	0	F.TVQQIQGNL.Q		30
974.02	2	225	241	1946.02	1946.05	-12	2	F.TVQQIQGNLQKEISVVY.G		35
974.02	2	225	241	1946.02	1946.05	-12	2	F.TVQQIQGNLQKEISVVY.G		35
974.02	2	225	241	1946.02	1946.05	-12	2	F.TVQQIQGNLQKEISVVY.G		35
649.692	3	225	241	1946.05	1946.05	4	2	F.TVQQIQGNLQKEISVVY.G		25
649.692	3	225	241	1946.05	1946.05	4	2	F.TVQQIQGNLQKEISVVY.G		25
649.699	3	225	241	1946.07	1946.05	14	2	F.TVQQIQGNLQKEISVVY.G		30
649.699	3	225	241	1946.07	1946.05	14	2	F.TVQQIQGNLQKEISVVY.G		30
649.699	3	225	241	1946.07	1946.05	14	2	F.TVQQIQGNLQKEISVVY.G		30
429.749	2	251	257	857.484	857.465	23	1	W.NILIEAW.G		22
429.749	2	251	257	857.484	857.465	23	1	W.NILIEAW.G		22
618.813	2	251	261	1235.61	1235.62	-6	2	W.NILIEAWGGTY.G		26
618.813	2	251	261	1235.61	1235.62	-6	2	W.NILIEAWGGTY.G		26
618.813	2	251	261	1235.61	1235.62	-6	2	W.NILIEAWGGTY.G		26
618.82	2	251	261	1235.62	1235.62	5	2	W.NILIEAWGGTY.G		33
618.82	2	251	261	1235.62	1235.62	5	2	W.NILIEAWGGTY.G		33
618.82	2	251	261	1235.62	1235.62	5	2	W.NILIEAWGGTY.G		33
618.821	2	251	261	1235.63	1235.62	7	2	W.NILIEAWGGTY.G		24
618.821	2	251	261	1235.63	1235.62	7	2	W.NILIEAWGGTY.G		24
618.821	2	251	261	1235.63	1235.62	7	2	W.NILIEAWGGTY.G		24
618.828	2	251	261	1235.64	1235.62	19	2	W.NILIEAWGGTY.G		26
618.828	2	251	261	1235.64	1235.62	19	2	W.NILIEAWGGTY.G		26
618.828	2	251	261	1235.64	1235.62	19	2	W.NILIEAWGGTY.G		26
618.833	2	251	261	1235.65	1235.62	26	2	W.NILIEAWGGTY.G		33
618.833	2	251	261	1235.65	1235.62	26	2	W.NILIEAWGGTY.G		33
462.742	2	265	273	923.469	923.46	10	2	Y.DSSLAVGLY.S		20
462.742	2	265	273	923.469	923.46	10	2	Y.DSSLAVGLY.S		20
447.716	2	274	282	893.417	893.413	4	1	Y.STLGASDPF.S		24
447.716	2	274	282	893.417	893.413	4	1	Y.STLGASDPF.S		24
447.717	2	274	282	893.42	893.413	8	1	Y.STLGASDPF.S		26
447.717	2	274	282	893.42	893.413	8	1	Y.STLGASDPF.S		26
447.717	2	274	282	893.42	893.413	8	1	Y.STLGASDPF.S		26
447.723	2	274	282	893.431	893.413	20	1	Y.STLGASDPF.S		21
447.723	2	274	282	893.431	893.413	20	1	Y.STLGASDPF.S		21
616.272	2	274	285	1230.53	1230.54	-9	2	Y.STLGASDPFSSY.Y		36
616.272	2	274	285	1230.53	1230.54	-9	2	Y.STLGASDPFSSY.Y		36
616.272	2	274	285	1230.53	1230.54	-9	2	Y.STLGASDPFSSY.Y		36
616.288	2	274	285	1230.56	1230.54	17	2	Y.STLGASDPFSSY.Y		20
616.288	2	274	285	1230.56	1230.54	17	2	Y.STLGASDPFSSY.Y		20
616.299	2	274	285	1230.58	1230.54	35	2	Y.STLGASDPFSSY.Y		21
616.299	2	274	285	1230.58	1230.54	35	2	Y.STLGASDPFSSY.Y		21
697.808	2	274	286	1393.6	1393.6	-1	3	Y.STLGASDPFSSYY.G		24
697.808	2	274	286	1393.6	1393.6	-1	3	Y.STLGASDPFSSYY.G		24
697.808	2	274	286	1393.6	1393.6	-1	3	Y.STLGASDPFSSYY.G		24
697.809	2	274	286	1393.6	1393.6	-1	3	Y.STLGASDPFSSYY.G		43
697.809	2	274	286	1393.6	1393.6	-1	3	Y.STLGASDPFSSYY.G		43
697.814	2	274	286	1393.61	1393.6	7	3	Y.STLGASDPFSSYY.G		61
697.814	2	274	286	1393.61	1393.6	7	3	Y.STLGASDPFSSYY.G		61
697.814	2	274	286	1393.61	1393.6	7	3	Y.STLGASDPFSSYY.G		21
697.814	2	274	286	1393.61	1393.6	7	3	Y.STLGASDPFSSYY.G		21
697.814	2	274	286	1393.61	1393.6	7	3	Y.STLGASDPFSSYY.G		25
697.814	2	274	286	1393.61	1393.6	7	3	Y.STLGASDPFSSYY.G		25
697.814	2	274	286	1393.61	1393.6	7	3	Y.STLGASDPFSSYY.G		25
697.814	2	274	286	1393.61	1393.6	7	3	Y.STLGASDPFSSYY.G		25
697.814	2	274	286	1393.61	1393.6	7	3	Y.STLGASDPFSSYY.G		24
697.814	2	274	286	1393.61	1393.6	7	3	Y.STLGASDPFSSYY.G		24
697.816	2	274	286	1393.62	1393.6	10	3	Y.STLGASDPFSSYY.G		32
697.816	2	274	286	1393.62	1393.6	10	3	Y.STLGASDPFSSYY.G		32
697.819	2	274	286	1393.62	1393.6	14	3	Y.STLGASDPFSSYY.G		22
697.819	2	274	286	1393.62	1393.6	14	3	Y.STLGASDPFSSYY.G		22
697.821	2	274	286	1393.63	1393.6	17	3	Y.STLGASDPFSSYY.G		44
697.821	2	274	286	1393.63	1393.6	17	3	Y.STLGASDPFSSYY.G		44
465.7	2	277	285	929.385	929.377	9	1	L.GASDPFSSY.Y		24
465.7	2	277	285	929.385	929.377	9	1	L.GASDPFSSY.Y		24
547.233	2	277	286	1092.45	1092.44	10	2	L.GASDPFSSYY.G		24
547.233	2	277	286	1092.45	1092.44	10	2	L.GASDPFSSYY.G		24
446.214	2	286	293	890.412	890.384	31	2	Y.YGLSMGTY.N		20
446.214	2	286	293	890.412	890.384	31	2	Y.YGLSMGTY.N		20
503.794	2	314	322	1005.57	1005.55	25	1	L.SLIIAQSQF.T		36
503.794	2	314	322	1005.57	1005.55	25	1	L.SLIIAQSQF.T		36
623.831	2	335	345	1245.65	1245.68	-23	1	K.IVELGINMSVR.I	Oxidation (M)	27
623.856	2	335	345	1245.7	1245.68	18	1	K.IVELGINMSVR.I	Oxidation (M)	65
623.878	2	335	345	1245.74	1245.68	53	1	K.IVELGINMSVR.I	Oxidation (M)	44
891.45	2	357	373	1780.89	1780.9	-8	2	Y.ALSNINGVYPSFAQSTL.L		24
891.45	2	357	373	1780.89	1780.9	-8	2	Y.ALSNINGVYPSFAQSTL.L		24
891.456	2	357	373	1780.9	1780.9	-1	2	Y.ALSNINGVYPSFAQSTL.L		20
891.456	2	357	373	1780.9	1780.9	-1	2	Y.ALSNINGVYPSFAQSTL.L		20
947.995	2	357	374	1893.98	1893.98	-4	3	Y.ALSNINGVYPSFAQSTLL.S		23
947.995	2	357	374	1893.98	1893.98	-4	3	Y.ALSNINGVYPSFAQSTLL.S		23
947.996	2	357	374	1893.98	1893.98	-3	3	Y.ALSNINGVYPSFAQSTLL.S		23
947.996	2	357	374	1893.98	1893.98	-3	3	Y.ALSNINGVYPSFAQSTLL.S		23
799.4	2	359	373	1596.78	1596.78	4	1	L.SNINGVYPSFAQSTL.L		20
799.4	2	359	373	1596.78	1596.78	4	1	L.SNINGVYPSFAQSTL.L		20
799.4	2	359	373	1596.78	1596.78	4	1	L.SNINGVYPSFAQSTL.L		20
553.274	2	397	408	1104.53	1104.52	12	1	Y.LSQGSANPGAGF.T		30
553.274	2	397	408	1104.53	1104.52	12	1	Y.LSQGSANPGAGF.T		30
553.274	2	397	408	1104.53	1104.52	12	1	Y.LSQGSANPGAGF.T		30
553.279	2	397	408	1104.54	1104.52	20	1	Y.LSQGSANPGAGF.T		28
553.279	2	397	408	1104.54	1104.52	20	1	Y.LSQGSANPGAGF.T		28
553.279	2	397	408	1104.54	1104.52	20	1	Y.LSQGSANPGAGF.T		28
553.28	2	397	408	1104.55	1104.52	23	1	Y.LSQGSANPGAGF.T		32
553.28	2	397	408	1104.55	1104.52	23	1	Y.LSQGSANPGAGF.T		32
786.357	2	397	412	1570.7	1570.69	6	2	Y.LSQGSANPGAGFTDSY.T		30
786.357	2	397	412	1570.7	1570.69	6	2	Y.LSQGSANPGAGFTDSY.T		30
786.357	2	397	412	1570.7	1570.69	7	2	Y.LSQGSANPGAGFTDSY.T		32
786.357	2	397	412	1570.7	1570.69	7	2	Y.LSQGSANPGAGFTDSY.T		32
795.716	4	397	420	2384.13	2384.08	21	3	Y.LSQGSANPGAGFTDSYTDEIGNAL.F		47
795.716	4	397	420	2384.13	2384.08	21	3	Y.LSQGSANPGAGFTDSYTDEIGNAL.F		47
795.719	4	397	420	2384.13	2384.08	24	3	Y.LSQGSANPGAGFTDSYTDEIGNAL.F		27
795.719	4	397	420	2384.13	2384.08	24	3	Y.LSQGSANPGAGFTDSYTDEIGNAL.F		27
729.812	2	398	412	1457.61	1457.61	2	1	L.SQGSANPGAGFTDSY.T		23
729.812	2	398	412	1457.61	1457.61	2	1	L.SQGSANPGAGFTDSY.T		23
807.025	3	398	421	2418.05	2418.06	-3	3	L.SQGSANPGAGFTDSYTDEIGNALF.T		21
807.025	3	398	421	2418.05	2418.06	-3	3	L.SQGSANPGAGFTDSYTDEIGNALF.T		21
807.025	3	398	421	2418.05	2418.06	-3	3	L.SQGSANPGAGFTDSYTDEIGNALF.T		21
807.036	3	398	421	2418.09	2418.06	10	3	L.SQGSANPGAGFTDSYTDEIGNALF.T		26
807.036	3	398	421	2418.09	2418.06	10	3	L.SQGSANPGAGFTDSYTDEIGNALF.T		26
807.036	3	398	421	2418.09	2418.06	10	3	L.SQGSANPGAGFTDSYTDEIGNALF.T		26
649.804	2	409	420	1297.59	1297.57	20	1	F.TDSYTDEIGNAL.F		31
649.804	2	409	420	1297.59	1297.57	20	1	F.TDSYTDEIGNAL.F		31
723.326	2	409	421	1444.64	1444.64	2	2	F.TDSYTDEIGNALF.T		41
723.326	2	409	421	1444.64	1444.64	2	2	F.TDSYTDEIGNALF.T		41
723.326	2	409	421	1444.64	1444.64	2	2	F.TDSYTDEIGNALF.T		41
723.33	2	409	421	1444.65	1444.64	7	2	F.TDSYTDEIGNALF.T		47
723.33	2	409	421	1444.65	1444.64	7	2	F.TDSYTDEIGNALF.T		47
723.33	2	409	421	1444.65	1444.64	7	2	F.TDSYTDEIGNALF.T		56
723.33	2	409	421	1444.65	1444.64	7	2	F.TDSYTDEIGNALF.T		56
723.33	2	409	421	1444.65	1444.64	7	2	F.TDSYTDEIGNALF.T		56
490.238	2	413	421	978.462	978.466	-4	1	Y.TDEIGNALF.T		20
490.238	2	413	421	978.462	978.466	-4	1	Y.TDEIGNALF.T		20
490.238	2	413	421	978.462	978.466	-4	1	Y.TDEIGNALF.T		20
490.239	2	413	421	978.464	978.466	-2	1	Y.TDEIGNALF.T		29
490.239	2	413	421	978.464	978.466	-2	1	Y.TDEIGNALF.T		29
490.239	2	413	421	978.464	978.466	-2	1	Y.TDEIGNALF.T		29
490.244	2	413	421	978.473	978.466	7	1	Y.TDEIGNALF.T		41
490.244	2	413	421	978.473	978.466	7	1	Y.TDEIGNALF.T		41
490.244	2	413	421	978.473	978.466	7	1	Y.TDEIGNALF.T		28
490.244	2	413	421	978.473	978.466	7	1	Y.TDEIGNALF.T		28
490.245	2	413	421	978.474	978.466	9	1	Y.TDEIGNALF.T		42
490.245	2	413	421	978.474	978.466	9	1	Y.TDEIGNALF.T		42
490.246	2	413	421	978.478	978.466	12	1	Y.TDEIGNALF.T		34
490.246	2	413	421	978.478	978.466	12	1	Y.TDEIGNALF.T		34
490.246	2	413	421	978.478	978.466	12	1	Y.TDEIGNALF.T		34
490.248	2	413	421	978.481	978.466	16	1	Y.TDEIGNALF.T		25
490.248	2	413	421	978.481	978.466	16	1	Y.TDEIGNALF.T		25
490.248	2	413	421	978.481	978.466	16	1	Y.TDEIGNALF.T		25
490.257	2	413	421	978.499	978.466	34	1	Y.TDEIGNALF.T		29
490.257	2	413	421	978.499	978.466	34	1	Y.TDEIGNALF.T		29
732.873	2	413	426	1463.73	1463.71	11	2	Y.TDEIGNALFTPSSL.T		68
732.873	2	413	426	1463.73	1463.71	11	2	Y.TDEIGNALFTPSSL.T		68
803.404	2	422	437	1604.79	1604.81	-9	1	F.TPSSLTVPGSGYPVPF.I		20
803.404	2	422	437	1604.79	1604.81	-9	1	F.TPSSLTVPGSGYPVPF.I		20
803.404	2	422	437	1604.79	1604.81	-9	1	F.TPSSLTVPGSGYPVPF.I		20
803.406	2	422	437	1604.8	1604.81	-7	1	F.TPSSLTVPGSGYPVPF.I		22
803.406	2	422	437	1604.8	1604.81	-7	1	F.TPSSLTVPGSGYPVPF.I		22
803.406	2	422	437	1604.8	1604.81	-7	1	F.TPSSLTVPGSGYPVPF.I		22
803.41	2	422	437	1604.81	1604.81	-1	1	F.TPSSLTVPGSGYPVPF.I		20
803.41	2	422	437	1604.81	1604.81	-1	1	F.TPSSLTVPGSGYPVPF.I		20
803.41	2	422	437	1604.81	1604.81	-1	1	F.TPSSLTVPGSGYPVPF.I		20
803.411	2	422	437	1604.81	1604.81	-1	1	F.TPSSLTVPGSGYPVPF.I		22
803.411	2	422	437	1604.81	1604.81	-1	1	F.TPSSLTVPGSGYPVPF.I		22
803.411	2	422	437	1604.81	1604.81	-1	1	F.TPSSLTVPGSGYPVPF.I		35
803.411	2	422	437	1604.81	1604.81	-1	1	F.TPSSLTVPGSGYPVPF.I		35
803.411	2	422	437	1604.81	1604.81	-1	1	F.TPSSLTVPGSGYPVPF.I		35
803.412	2	422	437	1604.81	1604.81	0	1	F.TPSSLTVPGSGYPVPF.I		21
803.412	2	422	437	1604.81	1604.81	0	1	F.TPSSLTVPGSGYPVPF.I		21
803.412	2	422	437	1604.81	1604.81	0	1	F.TPSSLTVPGSGYPVPF.I		21
803.414	2	422	437	1604.81	1604.81	2	1	F.TPSSLTVPGSGYPVPF.I		24
803.414	2	422	437	1604.81	1604.81	2	1	F.TPSSLTVPGSGYPVPF.I		24
803.414	2	422	437	1604.81	1604.81	4	1	F.TPSSLTVPGSGYPVPF.I		40
803.414	2	422	437	1604.81	1604.81	4	1	F.TPSSLTVPGSGYPVPF.I		40
803.414	2	422	437	1604.81	1604.81	4	1	F.TPSSLTVPGSGYPVPF.I		40
803.414	2	422	437	1604.81	1604.81	4	1	F.TPSSLTVPGSGYPVPF.I		25
803.414	2	422	437	1604.81	1604.81	4	1	F.TPSSLTVPGSGYPVPF.I		25
803.414	2	422	437	1604.81	1604.81	4	1	F.TPSSLTVPGSGYPVPF.I		25
803.414	2	422	437	1604.81	1604.81	4	1	F.TPSSLTVPGSGYPVPF.I		21
803.414	2	422	437	1604.81	1604.81	4	1	F.TPSSLTVPGSGYPVPF.I		21
803.414	2	422	437	1604.81	1604.81	4	1	F.TPSSLTVPGSGYPVPF.I		21
803.419	2	422	437	1604.82	1604.81	9	1	F.TPSSLTVPGSGYPVPF.I		20
803.419	2	422	437	1604.82	1604.81	9	1	F.TPSSLTVPGSGYPVPF.I		20
803.419	2	422	437	1604.82	1604.81	9	1	F.TPSSLTVPGSGYPVPF.I		20
803.419	2	422	437	1604.82	1604.81	9	1	F.TPSSLTVPGSGYPVPF.I		23
803.419	2	422	437	1604.82	1604.81	9	1	F.TPSSLTVPGSGYPVPF.I		23
803.419	2	422	437	1604.82	1604.81	9	1	F.TPSSLTVPGSGYPVPF.I		23
803.42	2	422	437	1604.83	1604.81	10	1	F.TPSSLTVPGSGYPVPF.I		21
803.42	2	422	437	1604.83	1604.81	10	1	F.TPSSLTVPGSGYPVPF.I		21
803.42	2	422	437	1604.83	1604.81	10	1	F.TPSSLTVPGSGYPVPF.I		21
803.421	2	422	437	1604.83	1604.81	11	1	F.TPSSLTVPGSGYPVPF.I		24
803.421	2	422	437	1604.83	1604.81	11	1	F.TPSSLTVPGSGYPVPF.I		24
803.423	2	422	437	1604.83	1604.81	15	1	F.TPSSLTVPGSGYPVPF.I		20
803.423	2	422	437	1604.83	1604.81	15	1	F.TPSSLTVPGSGYPVPF.I		20
803.429	2	422	437	1604.84	1604.81	21	1	F.TPSSLTVPGSGYPVPF.I		22
803.429	2	422	437	1604.84	1604.81	21	1	F.TPSSLTVPGSGYPVPF.I		22
560.793	2	427	437	1119.57	1119.56	10	0	L.TVPGSGYPVPF.I		20
560.793	2	427	437	1119.57	1119.56	10	0	L.TVPGSGYPVPF.I		20
560.793	2	427	437	1119.57	1119.56	10	0	L.TVPGSGYPVPF.I		20
344.213	2	438	442	686.412	686.364	70	2	F.IYTYK.I		25
701.86	2	460	470	1401.7	1401.7	0	2	L.WWNPTTQQITK.V		32
608.825	2	461	470	1215.63	1215.62	8	1	W.WNPTTQQITK.V		27
523.3	2	533	542	1044.58	1044.6	-12	2	Y.APALQTIKGF.K		21
523.3	2	533	542	1044.58	1044.6	-12	2	Y.APALQTIKGF.K		21
523.3	2	533	542	1044.58	1044.6	-12	2	Y.APALQTIKGF.K		21
523.3	2	533	542	1044.58	1044.6	-12	2	Y.APALQTIKGF.K		46
523.3	2	533	542	1044.58	1044.6	-12	2	Y.APALQTIKGF.K		46
523.3	2	533	542	1044.58	1044.6	-12	2	Y.APALQTIKGF.K		46
523.301	2	533	542	1044.59	1044.6	-10	2	Y.APALQTIKGF.K		73
523.301	2	533	542	1044.59	1044.6	-10	2	Y.APALQTIKGF.K		73
523.301	2	533	542	1044.59	1044.6	-10	2	Y.APALQTIKGF.K		73
523.301	2	533	542	1044.59	1044.6	-10	2	Y.APALQTIKGF.K		42
523.301	2	533	542	1044.59	1044.6	-10	2	Y.APALQTIKGF.K		42
523.301	2	533	542	1044.59	1044.6	-10	2	Y.APALQTIKGF.K		42
523.302	2	533	542	1044.59	1044.6	-8	2	Y.APALQTIKGF.K		41
523.302	2	533	542	1044.59	1044.6	-8	2	Y.APALQTIKGF.K		41
523.303	2	533	542	1044.59	1044.6	-6	2	Y.APALQTIKGF.K		34
523.303	2	533	542	1044.59	1044.6	-6	2	Y.APALQTIKGF.K		34
523.303	2	533	542	1044.59	1044.6	-6	2	Y.APALQTIKGF.K		34
523.303	2	533	542	1044.59	1044.6	-6	2	Y.APALQTIKGF.K		39
523.303	2	533	542	1044.59	1044.6	-6	2	Y.APALQTIKGF.K		39
523.303	2	533	542	1044.59	1044.6	-6	2	Y.APALQTIKGF.K		39
523.303	2	533	542	1044.59	1044.6	-6	2	Y.APALQTIKGF.K		36
523.303	2	533	542	1044.59	1044.6	-6	2	Y.APALQTIKGF.K		36
523.303	2	533	542	1044.59	1044.6	-6	2	Y.APALQTIKGF.K		36
523.304	2	533	542	1044.59	1044.6	-4	2	Y.APALQTIKGF.K		23
523.304	2	533	542	1044.59	1044.6	-4	2	Y.APALQTIKGF.K		23
523.304	2	533	542	1044.59	1044.6	-4	2	Y.APALQTIKGF.K		30
523.304	2	533	542	1044.59	1044.6	-4	2	Y.APALQTIKGF.K		30
523.304	2	533	542	1044.59	1044.6	-3	2	Y.APALQTIKGF.K		59
523.304	2	533	542	1044.59	1044.6	-3	2	Y.APALQTIKGF.K		59
523.304	2	533	542	1044.59	1044.6	-3	2	Y.APALQTIKGF.K		59
523.304	2	533	542	1044.59	1044.6	-3	2	Y.APALQTIKGF.K		22
523.304	2	533	542	1044.59	1044.6	-3	2	Y.APALQTIKGF.K		22
523.304	2	533	542	1044.59	1044.6	-3	2	Y.APALQTIKGF.K		22
523.304	2	533	542	1044.59	1044.6	-3	2	Y.APALQTIKGF.K		35
523.304	2	533	542	1044.59	1044.6	-3	2	Y.APALQTIKGF.K		35
523.304	2	533	542	1044.59	1044.6	-3	2	Y.APALQTIKGF.K		35
523.304	2	533	542	1044.59	1044.6	-3	2	Y.APALQTIKGF.K		39
523.304	2	533	542	1044.59	1044.6	-3	2	Y.APALQTIKGF.K		39
523.304	2	533	542	1044.59	1044.6	-3	2	Y.APALQTIKGF.K		39
523.304	2	533	542	1044.59	1044.6	-3	2	Y.APALQTIKGF.K		25
523.304	2	533	542	1044.59	1044.6	-3	2	Y.APALQTIKGF.K		25
523.304	2	533	542	1044.59	1044.6	-3	2	Y.APALQTIKGF.K		25
523.304	2	533	542	1044.59	1044.6	-3	2	Y.APALQTIKGF.K		44
523.304	2	533	542	1044.59	1044.6	-3	2	Y.APALQTIKGF.K		44
523.304	2	533	542	1044.59	1044.6	-3	2	Y.APALQTIKGF.K		22
523.304	2	533	542	1044.59	1044.6	-3	2	Y.APALQTIKGF.K		22
523.305	2	533	542	1044.59	1044.6	-2	2	Y.APALQTIKGF.K		25
523.305	2	533	542	1044.59	1044.6	-2	2	Y.APALQTIKGF.K		25
523.305	2	533	542	1044.59	1044.6	-2	2	Y.APALQTIKGF.K		25
523.305	2	533	542	1044.6	1044.6	-1	2	Y.APALQTIKGF.K		38
523.305	2	533	542	1044.6	1044.6	-1	2	Y.APALQTIKGF.K		38
523.305	2	533	542	1044.6	1044.6	-1	2	Y.APALQTIKGF.K		38
523.306	2	533	542	1044.6	1044.6	0	2	Y.APALQTIKGF.K		36
523.306	2	533	542	1044.6	1044.6	0	2	Y.APALQTIKGF.K		36
523.306	2	533	542	1044.6	1044.6	0	2	Y.APALQTIKGF.K		31
523.306	2	533	542	1044.6	1044.6	0	2	Y.APALQTIKGF.K		31
523.306	2	533	542	1044.6	1044.6	0	2	Y.APALQTIKGF.K		31
523.306	2	533	542	1044.6	1044.6	0	2	Y.APALQTIKGF.K		31
523.306	2	533	542	1044.6	1044.6	1	2	Y.APALQTIKGF.K		30
523.306	2	533	542	1044.6	1044.6	1	2	Y.APALQTIKGF.K		30
523.306	2	533	542	1044.6	1044.6	1	2	Y.APALQTIKGF.K		30
523.306	2	533	542	1044.6	1044.6	1	2	Y.APALQTIKGF.K		58
523.306	2	533	542	1044.6	1044.6	1	2	Y.APALQTIKGF.K		58
523.306	2	533	542	1044.6	1044.6	1	2	Y.APALQTIKGF.K		45
523.306	2	533	542	1044.6	1044.6	1	2	Y.APALQTIKGF.K		45
523.306	2	533	542	1044.6	1044.6	1	2	Y.APALQTIKGF.K		51
523.306	2	533	542	1044.6	1044.6	1	2	Y.APALQTIKGF.K		51
523.306	2	533	542	1044.6	1044.6	1	2	Y.APALQTIKGF.K		32
523.306	2	533	542	1044.6	1044.6	1	2	Y.APALQTIKGF.K		32
523.306	2	533	542	1044.6	1044.6	1	2	Y.APALQTIKGF.K		30
523.306	2	533	542	1044.6	1044.6	1	2	Y.APALQTIKGF.K		30
523.306	2	533	542	1044.6	1044.6	1	2	Y.APALQTIKGF.K		51
523.306	2	533	542	1044.6	1044.6	1	2	Y.APALQTIKGF.K		51
523.307	2	533	542	1044.6	1044.6	2	2	Y.APALQTIKGF.K		77
523.307	2	533	542	1044.6	1044.6	2	2	Y.APALQTIKGF.K		77
523.307	2	533	542	1044.6	1044.6	2	2	Y.APALQTIKGF.K		77
523.307	2	533	542	1044.6	1044.6	3	2	Y.APALQTIKGF.K		22
523.307	2	533	542	1044.6	1044.6	3	2	Y.APALQTIKGF.K		22
523.307	2	533	542	1044.6	1044.6	3	2	Y.APALQTIKGF.K		22
523.307	2	533	542	1044.6	1044.6	3	2	Y.APALQTIKGF.K		38
523.307	2	533	542	1044.6	1044.6	3	2	Y.APALQTIKGF.K		38
523.307	2	533	542	1044.6	1044.6	3	2	Y.APALQTIKGF.K		38
523.308	2	533	542	1044.6	1044.6	4	2	Y.APALQTIKGF.K		60
523.308	2	533	542	1044.6	1044.6	4	2	Y.APALQTIKGF.K		60
523.308	2	533	542	1044.6	1044.6	4	2	Y.APALQTIKGF.K		58
523.308	2	533	542	1044.6	1044.6	4	2	Y.APALQTIKGF.K		58
523.308	2	533	542	1044.6	1044.6	4	2	Y.APALQTIKGF.K		39
523.308	2	533	542	1044.6	1044.6	4	2	Y.APALQTIKGF.K		39
523.308	2	533	542	1044.6	1044.6	4	2	Y.APALQTIKGF.K		27
523.308	2	533	542	1044.6	1044.6	4	2	Y.APALQTIKGF.K		27
523.308	2	533	542	1044.6	1044.6	5	2	Y.APALQTIKGF.K		20
523.308	2	533	542	1044.6	1044.6	5	2	Y.APALQTIKGF.K		20
523.308	2	533	542	1044.6	1044.6	5	2	Y.APALQTIKGF.K		20
523.308	2	533	542	1044.6	1044.6	5	2	Y.APALQTIKGF.K		22
523.308	2	533	542	1044.6	1044.6	5	2	Y.APALQTIKGF.K		22
523.308	2	533	542	1044.6	1044.6	5	2	Y.APALQTIKGF.K		22
523.308	2	533	542	1044.6	1044.6	5	2	Y.APALQTIKGF.K		34
523.308	2	533	542	1044.6	1044.6	5	2	Y.APALQTIKGF.K		34
523.308	2	533	542	1044.6	1044.6	5	2	Y.APALQTIKGF.K		31
523.308	2	533	542	1044.6	1044.6	5	2	Y.APALQTIKGF.K		31
523.308	2	533	542	1044.6	1044.6	5	2	Y.APALQTIKGF.K		37
523.308	2	533	542	1044.6	1044.6	5	2	Y.APALQTIKGF.K		37
523.308	2	533	542	1044.6	1044.6	5	2	Y.APALQTIKGF.K		70
523.308	2	533	542	1044.6	1044.6	5	2	Y.APALQTIKGF.K		70
523.308	2	533	542	1044.6	1044.6	5	2	Y.APALQTIKGF.K		33
523.308	2	533	542	1044.6	1044.6	5	2	Y.APALQTIKGF.K		33
523.308	2	533	542	1044.6	1044.6	5	2	Y.APALQTIKGF.K		39
523.308	2	533	542	1044.6	1044.6	5	2	Y.APALQTIKGF.K		39
523.308	2	533	542	1044.6	1044.6	5	2	Y.APALQTIKGF.K		45
523.308	2	533	542	1044.6	1044.6	5	2	Y.APALQTIKGF.K		45
523.308	2	533	542	1044.6	1044.6	5	2	Y.APALQTIKGF.K		46
523.308	2	533	542	1044.6	1044.6	5	2	Y.APALQTIKGF.K		46
523.308	2	533	542	1044.6	1044.6	5	2	Y.APALQTIKGF.K		42
523.308	2	533	542	1044.6	1044.6	5	2	Y.APALQTIKGF.K		42
523.308	2	533	542	1044.6	1044.6	5	2	Y.APALQTIKGF.K		52
523.308	2	533	542	1044.6	1044.6	5	2	Y.APALQTIKGF.K		52
523.308	2	533	542	1044.6	1044.6	5	2	Y.APALQTIKGF.K		54
523.308	2	533	542	1044.6	1044.6	5	2	Y.APALQTIKGF.K		54
523.308	2	533	542	1044.6	1044.6	5	2	Y.APALQTIKGF.K		59
523.308	2	533	542	1044.6	1044.6	5	2	Y.APALQTIKGF.K		59
523.308	2	533	542	1044.6	1044.6	5	2	Y.APALQTIKGF.K		62
523.308	2	533	542	1044.6	1044.6	5	2	Y.APALQTIKGF.K		62
523.308	2	533	542	1044.6	1044.6	5	2	Y.APALQTIKGF.K		30
523.308	2	533	542	1044.6	1044.6	5	2	Y.APALQTIKGF.K		30
523.308	2	533	542	1044.6	1044.6	5	2	Y.APALQTIKGF.K		38
523.308	2	533	542	1044.6	1044.6	5	2	Y.APALQTIKGF.K		38
523.309	2	533	542	1044.6	1044.6	6	2	Y.APALQTIKGF.K		62
523.309	2	533	542	1044.6	1044.6	6	2	Y.APALQTIKGF.K		62
523.309	2	533	542	1044.6	1044.6	6	2	Y.APALQTIKGF.K		62
523.309	2	533	542	1044.6	1044.6	6	2	Y.APALQTIKGF.K		42
523.309	2	533	542	1044.6	1044.6	6	2	Y.APALQTIKGF.K		42
523.309	2	533	542	1044.6	1044.6	6	2	Y.APALQTIKGF.K		42
523.309	2	533	542	1044.6	1044.6	6	2	Y.APALQTIKGF.K		39
523.309	2	533	542	1044.6	1044.6	6	2	Y.APALQTIKGF.K		39
523.309	2	533	542	1044.6	1044.6	6	2	Y.APALQTIKGF.K		39
523.309	2	533	542	1044.6	1044.6	7	2	Y.APALQTIKGF.K		21
523.309	2	533	542	1044.6	1044.6	7	2	Y.APALQTIKGF.K		21
523.309	2	533	542	1044.6	1044.6	7	2	Y.APALQTIKGF.K		21
523.311	2	533	542	1044.61	1044.6	9	2	Y.APALQTIKGF.K		32
523.311	2	533	542	1044.61	1044.6	9	2	Y.APALQTIKGF.K		32
523.311	2	533	542	1044.61	1044.6	9	2	Y.APALQTIKGF.K		32
523.311	2	533	542	1044.61	1044.6	10	2	Y.APALQTIKGF.K		70
523.311	2	533	542	1044.61	1044.6	10	2	Y.APALQTIKGF.K		70
523.311	2	533	542	1044.61	1044.6	10	2	Y.APALQTIKGF.K		25
523.311	2	533	542	1044.61	1044.6	10	2	Y.APALQTIKGF.K		25
523.311	2	533	542	1044.61	1044.6	10	2	Y.APALQTIKGF.K		54
523.311	2	533	542	1044.61	1044.6	10	2	Y.APALQTIKGF.K		54
523.311	2	533	542	1044.61	1044.6	10	2	Y.APALQTIKGF.K		38
523.311	2	533	542	1044.61	1044.6	10	2	Y.APALQTIKGF.K		38
523.311	2	533	542	1044.61	1044.6	10	2	Y.APALQTIKGF.K		29
523.311	2	533	542	1044.61	1044.6	10	2	Y.APALQTIKGF.K		29
523.311	2	533	542	1044.61	1044.6	10	2	Y.APALQTIKGF.K		46
523.311	2	533	542	1044.61	1044.6	10	2	Y.APALQTIKGF.K		46
523.311	2	533	542	1044.61	1044.6	10	2	Y.APALQTIKGF.K		36
523.311	2	533	542	1044.61	1044.6	10	2	Y.APALQTIKGF.K		36
523.311	2	533	542	1044.61	1044.6	10	2	Y.APALQTIKGF.K		55
523.311	2	533	542	1044.61	1044.6	10	2	Y.APALQTIKGF.K		55
523.311	2	533	542	1044.61	1044.6	10	2	Y.APALQTIKGF.K		58
523.311	2	533	542	1044.61	1044.6	10	2	Y.APALQTIKGF.K		58
523.311	2	533	542	1044.61	1044.6	10	2	Y.APALQTIKGF.K		33
523.311	2	533	542	1044.61	1044.6	10	2	Y.APALQTIKGF.K		33
523.311	2	533	542	1044.61	1044.6	10	2	Y.APALQTIKGF.K		36
523.311	2	533	542	1044.61	1044.6	10	2	Y.APALQTIKGF.K		36
523.311	2	533	542	1044.61	1044.6	10	2	Y.APALQTIKGF.K		50
523.311	2	533	542	1044.61	1044.6	10	2	Y.APALQTIKGF.K		50
523.311	2	533	542	1044.61	1044.6	10	2	Y.APALQTIKGF.K		21
523.311	2	533	542	1044.61	1044.6	10	2	Y.APALQTIKGF.K		21
523.311	2	533	542	1044.61	1044.6	10	2	Y.APALQTIKGF.K		25
523.311	2	533	542	1044.61	1044.6	10	2	Y.APALQTIKGF.K		25
523.311	2	533	542	1044.61	1044.6	10	2	Y.APALQTIKGF.K		68
523.311	2	533	542	1044.61	1044.6	10	2	Y.APALQTIKGF.K		68
523.311	2	533	542	1044.61	1044.6	10	2	Y.APALQTIKGF.K		68
523.311	2	533	542	1044.61	1044.6	10	2	Y.APALQTIKGF.K		73
523.311	2	533	542	1044.61	1044.6	10	2	Y.APALQTIKGF.K		73
523.311	2	533	542	1044.61	1044.6	10	2	Y.APALQTIKGF.K		73
523.311	2	533	542	1044.61	1044.6	10	2	Y.APALQTIKGF.K		35
523.311	2	533	542	1044.61	1044.6	10	2	Y.APALQTIKGF.K		35
523.311	2	533	542	1044.61	1044.6	10	2	Y.APALQTIKGF.K		35
523.311	2	533	542	1044.61	1044.6	10	2	Y.APALQTIKGF.K		33
523.311	2	533	542	1044.61	1044.6	10	2	Y.APALQTIKGF.K		33
523.311	2	533	542	1044.61	1044.6	10	2	Y.APALQTIKGF.K		33
523.311	2	533	542	1044.61	1044.6	10	2	Y.APALQTIKGF.K		28
523.311	2	533	542	1044.61	1044.6	10	2	Y.APALQTIKGF.K		28
523.311	2	533	542	1044.61	1044.6	10	2	Y.APALQTIKGF.K		28
523.311	2	533	542	1044.61	1044.6	10	2	Y.APALQTIKGF.K		34
523.311	2	533	542	1044.61	1044.6	10	2	Y.APALQTIKGF.K		34
523.311	2	533	542	1044.61	1044.6	10	2	Y.APALQTIKGF.K		34
523.311	2	533	542	1044.61	1044.6	11	2	Y.APALQTIKGF.K		21
523.311	2	533	542	1044.61	1044.6	11	2	Y.APALQTIKGF.K		21
523.311	2	533	542	1044.61	1044.6	11	2	Y.APALQTIKGF.K		21
523.311	2	533	542	1044.61	1044.6	11	2	Y.APALQTIKGF.K		60
523.311	2	533	542	1044.61	1044.6	11	2	Y.APALQTIKGF.K		60
523.311	2	533	542	1044.61	1044.6	11	2	Y.APALQTIKGF.K		60
523.311	2	533	542	1044.61	1044.6	11	2	Y.APALQTIKGF.K		30
523.311	2	533	542	1044.61	1044.6	11	2	Y.APALQTIKGF.K		30
523.311	2	533	542	1044.61	1044.6	11	2	Y.APALQTIKGF.K		30
523.311	2	533	542	1044.61	1044.6	11	2	Y.APALQTIKGF.K		27
523.311	2	533	542	1044.61	1044.6	11	2	Y.APALQTIKGF.K		27
523.311	2	533	542	1044.61	1044.6	11	2	Y.APALQTIKGF.K		27
523.312	2	533	542	1044.61	1044.6	13	2	Y.APALQTIKGF.K		25
523.312	2	533	542	1044.61	1044.6	13	2	Y.APALQTIKGF.K		25
523.313	2	533	542	1044.61	1044.6	14	2	Y.APALQTIKGF.K		26
523.313	2	533	542	1044.61	1044.6	14	2	Y.APALQTIKGF.K		26
523.313	2	533	542	1044.61	1044.6	14	2	Y.APALQTIKGF.K		26
523.313	2	533	542	1044.61	1044.6	14	2	Y.APALQTIKGF.K		26
523.313	2	533	542	1044.61	1044.6	14	2	Y.APALQTIKGF.K		43
523.313	2	533	542	1044.61	1044.6	14	2	Y.APALQTIKGF.K		43
523.313	2	533	542	1044.61	1044.6	14	2	Y.APALQTIKGF.K		48
523.313	2	533	542	1044.61	1044.6	14	2	Y.APALQTIKGF.K		48
523.313	2	533	542	1044.61	1044.6	14	2	Y.APALQTIKGF.K		37
523.313	2	533	542	1044.61	1044.6	14	2	Y.APALQTIKGF.K		37
523.313	2	533	542	1044.61	1044.6	14	2	Y.APALQTIKGF.K		37
523.313	2	533	542	1044.61	1044.6	14	2	Y.APALQTIKGF.K		34
523.313	2	533	542	1044.61	1044.6	14	2	Y.APALQTIKGF.K		34
523.313	2	533	542	1044.61	1044.6	14	2	Y.APALQTIKGF.K		34
523.315	2	533	542	1044.62	1044.6	18	2	Y.APALQTIKGF.K		41
523.315	2	533	542	1044.62	1044.6	18	2	Y.APALQTIKGF.K		31
523.315	2	533	542	1044.62	1044.6	18	2	Y.APALQTIKGF.K		31
523.315	2	533	542	1044.62	1044.6	18	2	Y.APALQTIKGF.K		46
523.315	2	533	542	1044.62	1044.6	18	2	Y.APALQTIKGF.K		46
523.315	2	533	542	1044.62	1044.6	18	2	Y.APALQTIKGF.K		39
523.315	2	533	542	1044.62	1044.6	18	2	Y.APALQTIKGF.K		39
523.315	2	533	542	1044.62	1044.6	18	2	Y.APALQTIKGF.K		51
523.315	2	533	542	1044.62	1044.6	18	2	Y.APALQTIKGF.K		51
523.315	2	533	542	1044.62	1044.6	18	2	Y.APALQTIKGF.K		31
523.315	2	533	542	1044.62	1044.6	18	2	Y.APALQTIKGF.K		31
523.315	2	533	542	1044.62	1044.6	18	2	Y.APALQTIKGF.K		46
523.315	2	533	542	1044.62	1044.6	18	2	Y.APALQTIKGF.K		46
523.315	2	533	542	1044.62	1044.6	19	2	Y.APALQTIKGF.K		21
523.315	2	533	542	1044.62	1044.6	19	2	Y.APALQTIKGF.K		21
523.315	2	533	542	1044.62	1044.6	19	2	Y.APALQTIKGF.K		21
523.32	2	533	542	1044.62	1044.6	27	2	Y.APALQTIKGF.K		23
523.32	2	533	542	1044.62	1044.6	27	2	Y.APALQTIKGF.K		23
523.32	2	533	542	1044.62	1044.6	27	2	Y.APALQTIKGF.K		23
523.322	2	533	542	1044.63	1044.6	30	2	Y.APALQTIKGF.K		45
523.322	2	533	542	1044.63	1044.6	30	2	Y.APALQTIKGF.K		45
612.825	2	558	568	1223.64	1223.61	24	2	W.FFDPTEAVVSL.F		38
612.825	2	558	568	1223.64	1223.61	24	2	W.FFDPTEAVVSL.F		38
686.339	2	558	569	1370.66	1370.68	-9	3	W.FFDPTEAVVSLF.G		20
686.339	2	558	569	1370.66	1370.68	-9	3	W.FFDPTEAVVSLF.G		20
686.339	2	558	569	1370.66	1370.68	-9	3	W.FFDPTEAVVSLF.G		20
686.344	2	558	569	1370.67	1370.68	-2	3	W.FFDPTEAVVSLF.G		22
686.344	2	558	569	1370.67	1370.68	-2	3	W.FFDPTEAVVSLF.G		22
686.346	2	558	569	1370.68	1370.68	1	3	W.FFDPTEAVVSLF.G		30
686.346	2	558	569	1370.68	1370.68	1	3	W.FFDPTEAVVSLF.G		30
686.346	2	558	569	1370.68	1370.68	1	3	W.FFDPTEAVVSLF.G		30
686.346	2	558	569	1370.68	1370.68	1	3	W.FFDPTEAVVSLF.G		21
686.346	2	558	569	1370.68	1370.68	1	3	W.FFDPTEAVVSLF.G		21
686.346	2	558	569	1370.68	1370.68	1	3	W.FFDPTEAVVSLF.G		32
686.346	2	558	569	1370.68	1370.68	1	3	W.FFDPTEAVVSLF.G		32
686.347	2	558	569	1370.68	1370.68	2	3	W.FFDPTEAVVSLF.G		34
686.347	2	558	569	1370.68	1370.68	2	3	W.FFDPTEAVVSLF.G		34
686.347	2	558	569	1370.68	1370.68	2	3	W.FFDPTEAVVSLF.G		34
686.347	2	558	569	1370.68	1370.68	2	3	W.FFDPTEAVVSLF.G		34
686.347	2	558	569	1370.68	1370.68	2	3	W.FFDPTEAVVSLF.G		34
686.349	2	558	569	1370.68	1370.68	5	3	W.FFDPTEAVVSLF.G		33
686.349	2	558	569	1370.68	1370.68	5	3	W.FFDPTEAVVSLF.G		33
686.349	2	558	569	1370.68	1370.68	5	3	W.FFDPTEAVVSLF.G		21
686.349	2	558	569	1370.68	1370.68	5	3	W.FFDPTEAVVSLF.G		21
686.349	2	558	569	1370.68	1370.68	5	3	W.FFDPTEAVVSLF.G		41
686.349	2	558	569	1370.68	1370.68	5	3	W.FFDPTEAVVSLF.G		41
686.349	2	558	569	1370.68	1370.68	5	3	W.FFDPTEAVVSLF.G		41
686.352	2	558	569	1370.69	1370.68	10	3	W.FFDPTEAVVSLF.G		26
686.352	2	558	569	1370.69	1370.68	10	3	W.FFDPTEAVVSLF.G		26
686.354	2	558	569	1370.69	1370.68	12	3	W.FFDPTEAVVSLF.G		21
686.354	2	558	569	1370.69	1370.68	12	3	W.FFDPTEAVVSLF.G		21
686.354	2	558	569	1370.69	1370.68	12	3	W.FFDPTEAVVSLF.G		21
686.354	2	558	569	1370.69	1370.68	12	3	W.FFDPTEAVVSLF.G		52
686.354	2	558	569	1370.69	1370.68	12	3	W.FFDPTEAVVSLF.G		52
686.354	2	558	569	1370.69	1370.68	12	3	W.FFDPTEAVVSLF.G		52
686.359	2	558	569	1370.7	1370.68	20	3	W.FFDPTEAVVSLF.G		22
686.359	2	558	569	1370.7	1370.68	20	3	W.FFDPTEAVVSLF.G		22
686.359	2	558	569	1370.7	1370.68	20	3	W.FFDPTEAVVSLF.G		22
686.359	2	558	569	1370.7	1370.68	20	3	W.FFDPTEAVVSLF.G		23
686.359	2	558	569	1370.7	1370.68	20	3	W.FFDPTEAVVSLF.G		23
686.359	2	558	569	1370.7	1370.68	20	3	W.FFDPTEAVVSLF.G		23
686.365	2	558	569	1370.71	1370.68	29	3	W.FFDPTEAVVSLF.G		30
686.365	2	558	569	1370.71	1370.68	29	3	W.FFDPTEAVVSLF.G		30
427.705	2	570	577	853.395	853.397	-2	2	F.GSFNPLGY.A		22
427.705	2	570	577	853.395	853.397	-2	2	F.GSFNPLGY.A		22
427.705	2	570	577	853.395	853.397	-2	2	F.GSFNPLGY.A		22
427.705	2	570	577	853.396	853.397	-1	2	F.GSFNPLGY.A		28
427.705	2	570	577	853.396	853.397	-1	2	F.GSFNPLGY.A		28
427.706	2	570	577	853.398	853.397	2	2	F.GSFNPLGY.A		29
427.706	2	570	577	853.398	853.397	2	2	F.GSFNPLGY.A		29
427.707	2	570	577	853.398	853.397	2	2	F.GSFNPLGY.A		37
427.707	2	570	577	853.398	853.397	2	2	F.GSFNPLGY.A		37
427.707	2	570	577	853.398	853.397	2	2	F.GSFNPLGY.A		37
427.707	2	570	577	853.4	853.397	4	2	F.GSFNPLGY.A		35
427.707	2	570	577	853.4	853.397	4	2	F.GSFNPLGY.A		35
427.707	2	570	577	853.4	853.397	4	2	F.GSFNPLGY.A		39
427.707	2	570	577	853.4	853.397	4	2	F.GSFNPLGY.A		39
427.708	2	570	577	853.402	853.397	6	2	F.GSFNPLGY.A		28
427.708	2	570	577	853.402	853.397	6	2	F.GSFNPLGY.A		28
427.709	2	570	577	853.404	853.397	8	2	F.GSFNPLGY.A		31
427.709	2	570	577	853.404	853.397	8	2	F.GSFNPLGY.A		31
427.711	2	570	577	853.407	853.397	12	2	F.GSFNPLGY.A		24
427.711	2	570	577	853.407	853.397	12	2	F.GSFNPLGY.A		24
427.711	2	570	577	853.407	853.397	12	2	F.GSFNPLGY.A		24
427.711	2	570	577	853.407	853.397	12	2	F.GSFNPLGY.A		26
427.711	2	570	577	853.407	853.397	12	2	F.GSFNPLGY.A		26
427.711	2	570	577	853.407	853.397	12	2	F.GSFNPLGY.A		26
427.711	2	570	577	853.408	853.397	13	2	F.GSFNPLGY.A		32
427.711	2	570	577	853.408	853.397	13	2	F.GSFNPLGY.A		32
427.711	2	570	577	853.408	853.397	13	2	F.GSFNPLGY.A		32
427.711	2	570	577	853.408	853.397	13	2	F.GSFNPLGY.A		24
427.711	2	570	577	853.408	853.397	13	2	F.GSFNPLGY.A		24
427.711	2	570	577	853.408	853.397	13	2	F.GSFNPLGY.A		24
427.713	2	570	577	853.411	853.397	16	2	F.GSFNPLGY.A		32
427.713	2	570	577	853.411	853.397	16	2	F.GSFNPLGY.A		32
519.753	2	578	587	1037.49	1037.5	-6	2	Y.ALAGGGYFPW.Q		22
519.753	2	578	587	1037.49	1037.5	-6	2	Y.ALAGGGYFPW.Q		22
519.753	2	578	587	1037.49	1037.5	-6	2	Y.ALAGGGYFPW.Q		22
519.755	2	578	587	1037.49	1037.5	-2	2	Y.ALAGGGYFPW.Q		21
519.755	2	578	587	1037.49	1037.5	-2	2	Y.ALAGGGYFPW.Q		21
519.755	2	578	587	1037.49	1037.5	-2	2	Y.ALAGGGYFPW.Q		21
519.758	2	578	587	1037.5	1037.5	4	2	Y.ALAGGGYFPW.Q		23
519.758	2	578	587	1037.5	1037.5	4	2	Y.ALAGGGYFPW.Q		23
519.758	2	578	587	1037.5	1037.5	4	2	Y.ALAGGGYFPW.Q		23
519.758	2	578	587	1037.5	1037.5	4	2	Y.ALAGGGYFPW.Q		23
519.758	2	578	587	1037.5	1037.5	4	2	Y.ALAGGGYFPW.Q		23
519.758	2	578	587	1037.5	1037.5	4	2	Y.ALAGGGYFPW.Q		21
519.758	2	578	587	1037.5	1037.5	4	2	Y.ALAGGGYFPW.Q		21
519.758	2	578	587	1037.5	1037.5	4	2	Y.ALAGGGYFPW.Q		21
519.758	2	578	587	1037.5	1037.5	5	2	Y.ALAGGGYFPW.Q		23
519.758	2	578	587	1037.5	1037.5	5	2	Y.ALAGGGYFPW.Q		23
519.759	2	578	587	1037.5	1037.5	6	2	Y.ALAGGGYFPW.Q		24
519.759	2	578	587	1037.5	1037.5	6	2	Y.ALAGGGYFPW.Q		24
519.759	2	578	587	1037.5	1037.5	6	2	Y.ALAGGGYFPW.Q		24
519.76	2	578	587	1037.51	1037.5	8	2	Y.ALAGGGYFPW.Q		23
519.76	2	578	587	1037.51	1037.5	8	2	Y.ALAGGGYFPW.Q		23
519.76	2	578	587	1037.51	1037.5	8	2	Y.ALAGGGYFPW.Q		23
519.76	2	578	587	1037.51	1037.5	8	2	Y.ALAGGGYFPW.Q		23
519.761	2	578	587	1037.51	1037.5	10	2	Y.ALAGGGYFPW.Q		24
519.761	2	578	587	1037.51	1037.5	10	2	Y.ALAGGGYFPW.Q		24
519.761	2	578	587	1037.51	1037.5	10	2	Y.ALAGGGYFPW.Q		24
519.763	2	578	587	1037.51	1037.5	13	2	Y.ALAGGGYFPW.Q		34
519.763	2	578	587	1037.51	1037.5	13	2	Y.ALAGGGYFPW.Q		34
519.763	2	578	587	1037.51	1037.5	14	2	Y.ALAGGGYFPW.Q		21
519.763	2	578	587	1037.51	1037.5	14	2	Y.ALAGGGYFPW.Q		21
519.763	2	578	587	1037.51	1037.5	14	2	Y.ALAGGGYFPW.Q		21
519.763	2	578	587	1037.51	1037.5	14	2	Y.ALAGGGYFPW.Q		20
519.763	2	578	587	1037.51	1037.5	14	2	Y.ALAGGGYFPW.Q		20
519.763	2	578	587	1037.51	1037.5	14	2	Y.ALAGGGYFPW.Q		20
519.763	2	578	587	1037.51	1037.5	14	2	Y.ALAGGGYFPW.Q		23
519.763	2	578	587	1037.51	1037.5	14	2	Y.ALAGGGYFPW.Q		23
519.763	2	578	587	1037.51	1037.5	14	2	Y.ALAGGGYFPW.Q		23
519.764	2	578	587	1037.51	1037.5	16	2	Y.ALAGGGYFPW.Q		20
519.764	2	578	587	1037.51	1037.5	16	2	Y.ALAGGGYFPW.Q		20
519.767	2	578	587	1037.52	1037.5	21	2	Y.ALAGGGYFPW.Q		27
519.767	2	578	587	1037.52	1037.5	21	2	Y.ALAGGGYFPW.Q		27
519.767	2	578	587	1037.52	1037.5	22	2	Y.ALAGGGYFPW.Q		29
519.767	2	578	587	1037.52	1037.5	22	2	Y.ALAGGGYFPW.Q		29
519.769	2	578	587	1037.52	1037.5	26	2	Y.ALAGGGYFPW.Q		22
519.769	2	578	587	1037.52	1037.5	26	2	Y.ALAGGGYFPW.Q		22
738.829	2	578	590	1475.64	1475.65	-8	3	Y.ALAGGGYFPWQMY.V	Oxidation (M)	21
738.829	2	578	590	1475.64	1475.65	-8	3	Y.ALAGGGYFPWQMY.V	Oxidation (M)	21
738.829	2	578	590	1475.64	1475.65	-8	3	Y.ALAGGGYFPWQMY.V	Oxidation (M)	21
738.835	2	578	590	1475.66	1475.65	1	3	Y.ALAGGGYFPWQMY.V	Oxidation (M)	54
738.835	2	578	590	1475.66	1475.65	1	3	Y.ALAGGGYFPWQMY.V	Oxidation (M)	54
738.84	2	578	590	1475.67	1475.65	7	3	Y.ALAGGGYFPWQMY.V	Oxidation (M)	48
738.84	2	578	590	1475.67	1475.65	7	3	Y.ALAGGGYFPWQMY.V	Oxidation (M)	48
427.697	2	580	587	853.379	853.376	4	1	L.AGGGYFPW.Q		27
427.697	2	580	587	853.379	853.376	4	1	L.AGGGYFPW.Q		27
427.697	2	580	587	853.379	853.376	4	1	L.AGGGYFPW.Q		27
427.701	2	580	587	853.387	853.376	12	1	L.AGGGYFPW.Q		20
427.701	2	580	587	853.387	853.376	12	1	L.AGGGYFPW.Q		20
566.322	2	591	601	1130.63	1130.61	15	1	Y.VGMKDVVAQGK.A		64
566.322	2	591	601	1130.63	1130.61	15	1	Y.VGMKDVVAQGK.A		64
566.322	2	591	601	1130.63	1130.61	15	1	Y.VGMKDVVAQGK.A		64
566.322	2	591	601	1130.63	1130.61	15	1	Y.VGMKDVVAQGK.A		46
566.322	2	591	601	1130.63	1130.61	15	1	Y.VGMKDVVAQGK.A		46
566.322	2	591	601	1130.63	1130.61	16	1	Y.VGMKDVVAQGK.A		62
566.322	2	591	601	1130.63	1130.61	16	1	Y.VGMKDVVAQGK.A		62
566.322	2	591	601	1130.63	1130.61	16	1	Y.VGMKDVVAQGK.A		62
730.387	2	591	604	1458.76	1458.77	-5	2	Y.VGMKDVVAQGKAAW.S		62
730.387	2	591	604	1458.76	1458.77	-5	2	Y.VGMKDVVAQGKAAW.S		62
730.387	2	591	604	1458.76	1458.77	-5	2	Y.VGMKDVVAQGKAAW.S		62
730.389	2	591	604	1458.76	1458.77	-1	2	Y.VGMKDVVAQGKAAW.S		27
730.389	2	591	604	1458.76	1458.77	-1	2	Y.VGMKDVVAQGKAAW.S		27
730.389	2	591	604	1458.76	1458.77	-1	2	Y.VGMKDVVAQGKAAW.S		27
730.39	2	591	604	1458.77	1458.77	0	2	Y.VGMKDVVAQGKAAW.S		35
730.39	2	591	604	1458.77	1458.77	0	2	Y.VGMKDVVAQGKAAW.S		35
730.39	2	591	604	1458.77	1458.77	0	2	Y.VGMKDVVAQGKAAW.S		35
730.39	2	591	604	1458.77	1458.77	1	2	Y.VGMKDVVAQGKAAW.S		45
730.39	2	591	604	1458.77	1458.77	1	2	Y.VGMKDVVAQGKAAW.S		45
487.263	3	591	604	1458.77	1458.77	1	2	Y.VGMKDVVAQGKAAW.S		22
487.263	3	591	604	1458.77	1458.77	1	2	Y.VGMKDVVAQGKAAW.S		22
487.263	3	591	604	1458.77	1458.77	1	2	Y.VGMKDVVAQGKAAW.S		22
487.265	3	591	604	1458.77	1458.77	5	2	Y.VGMKDVVAQGKAAW.S		34
487.265	3	591	604	1458.77	1458.77	5	2	Y.VGMKDVVAQGKAAW.S		34
487.265	3	591	604	1458.77	1458.77	5	2	Y.VGMKDVVAQGKAAW.S		34
487.267	3	591	604	1458.78	1458.77	9	2	Y.VGMKDVVAQGKAAW.S		28
487.267	3	591	604	1458.78	1458.77	9	2	Y.VGMKDVVAQGKAAW.S		28
487.267	3	591	604	1458.78	1458.77	9	2	Y.VGMKDVVAQGKAAW.S		28
487.267	3	591	604	1458.78	1458.77	9	2	Y.VGMKDVVAQGKAAW.S		21
487.267	3	591	604	1458.78	1458.77	9	2	Y.VGMKDVVAQGKAAW.S		21
487.267	3	591	604	1458.78	1458.77	9	2	Y.VGMKDVVAQGKAAW.S		21
487.27	3	591	604	1458.79	1458.77	15	2	Y.VGMKDVVAQGKAAW.S		41
487.27	3	591	604	1458.79	1458.77	15	2	Y.VGMKDVVAQGKAAW.S		41
487.27	3	591	604	1458.79	1458.77	15	2	Y.VGMKDVVAQGKAAW.S		41
487.27	3	591	604	1458.79	1458.77	16	2	Y.VGMKDVVAQGKAAW.S		43
487.27	3	591	604	1458.79	1458.77	16	2	Y.VGMKDVVAQGKAAW.S		43
487.272	3	591	604	1458.79	1458.77	19	2	Y.VGMKDVVAQGKAAW.S		41
487.272	3	591	604	1458.79	1458.77	19	2	Y.VGMKDVVAQGKAAW.S		41
487.272	3	591	604	1458.79	1458.77	19	2	Y.VGMKDVVAQGKAAW.S		41
487.274	3	591	604	1458.8	1458.77	23	2	Y.VGMKDVVAQGKAAW.S		24
487.274	3	591	604	1458.8	1458.77	23	2	Y.VGMKDVVAQGKAAW.S		24
487.274	3	591	604	1458.8	1458.77	23	2	Y.VGMKDVVAQGKAAW.S		24
487.276	3	591	604	1458.81	1458.77	29	2	Y.VGMKDVVAQGKAAW.S		32
487.276	3	591	604	1458.81	1458.77	29	2	Y.VGMKDVVAQGKAAW.S		32
487.28	3	591	604	1458.82	1458.77	36	2	Y.VGMKDVVAQGKAAW.S		21
487.28	3	591	604	1458.82	1458.77	36	2	Y.VGMKDVVAQGKAAW.S		21
487.28	3	591	604	1458.82	1458.77	36	2	Y.VGMKDVVAQGKAAW.S		21
738.389	2	591	604	1474.76	1474.76	3	2	Y.VGMKDVVAQGKAAW.S	Oxidation (M)	31
738.389	2	591	604	1474.76	1474.76	3	2	Y.VGMKDVVAQGKAAW.S	Oxidation (M)	31
738.389	2	591	604	1474.76	1474.76	3	2	Y.VGMKDVVAQGKAAW.S	Oxidation (M)	31
553.277	2	602	612	1104.54	1104.52	17	1	K.AAWSEGAAQSK.G		30
553.277	2	602	612	1104.54	1104.52	18	1	K.AAWSEGAAQSK.G		42
553.286	2	602	612	1104.56	1104.52	34	1	K.AAWSEGAAQSK.G		42
553.287	2	602	612	1104.56	1104.52	35	1	K.AAWSEGAAQSK.G		47
553.287	2	602	612	1104.56	1104.52	36	1	K.AAWSEGAAQSK.G		32
553.289	2	602	612	1104.56	1104.52	40	1	K.AAWSEGAAQSK.G		48
553.29	2	602	612	1104.57	1104.52	42	1	K.AAWSEGAAQSK.G		38
553.29	2	602	612	1104.57	1104.52	42	1	K.AAWSEGAAQSK.G		24
553.297	2	602	612	1104.58	1104.52	54	1	K.AAWSEGAAQSK.G		32
553.303	2	602	612	1104.59	1104.52	65	1	K.AAWSEGAAQSK.G		38
553.304	2	602	612	1104.59	1104.52	66	1	K.AAWSEGAAQSK.G		32
553.304	2	602	612	1104.59	1104.52	66	1	K.AAWSEGAAQSK.G		38
624.797	2	605	616	1247.58	1247.58	1	1	W.SEGAAQSKGIDW.L		36
624.797	2	605	616	1247.58	1247.58	1	1	W.SEGAAQSKGIDW.L		36
624.797	2	605	616	1247.58	1247.58	1	1	W.SEGAAQSKGIDW.L		36
624.799	2	605	616	1247.58	1247.58	4	1	W.SEGAAQSKGIDW.L		47
624.799	2	605	616	1247.58	1247.58	4	1	W.SEGAAQSKGIDW.L		47
624.799	2	605	616	1247.58	1247.58	4	1	W.SEGAAQSKGIDW.L		47
624.8	2	605	616	1247.59	1247.58	6	1	W.SEGAAQSKGIDW.L		24
624.8	2	605	616	1247.59	1247.58	6	1	W.SEGAAQSKGIDW.L		24
624.8	2	605	616	1247.59	1247.58	6	1	W.SEGAAQSKGIDW.L		24
624.802	2	605	616	1247.59	1247.58	9	1	W.SEGAAQSKGIDW.L		50
624.802	2	605	616	1247.59	1247.58	9	1	W.SEGAAQSKGIDW.L		50
624.806	2	605	616	1247.6	1247.58	15	1	W.SEGAAQSKGIDW.L		50
624.806	2	605	616	1247.6	1247.58	15	1	W.SEGAAQSKGIDW.L		50
624.806	2	605	616	1247.6	1247.58	15	1	W.SEGAAQSKGIDW.L		50
624.81	2	605	616	1247.61	1247.58	22	1	W.SEGAAQSKGIDW.L		37
624.81	2	605	616	1247.61	1247.58	22	1	W.SEGAAQSKGIDW.L		37
624.81	2	605	616	1247.61	1247.58	22	1	W.SEGAAQSKGIDW.L		51
624.81	2	605	616	1247.61	1247.58	22	1	W.SEGAAQSKGIDW.L		51
681.337	2	605	617	1360.66	1360.66	-2	2	W.SEGAAQSKGIDWL.N		47
681.337	2	605	617	1360.66	1360.66	-2	2	W.SEGAAQSKGIDWL.N		47
681.337	2	605	617	1360.66	1360.66	-2	2	W.SEGAAQSKGIDWL.N		47
681.337	2	605	617	1360.66	1360.66	-1	2	W.SEGAAQSKGIDWL.N		34
681.337	2	605	617	1360.66	1360.66	-1	2	W.SEGAAQSKGIDWL.N		34
681.338	2	605	617	1360.66	1360.66	-1	2	W.SEGAAQSKGIDWL.N		50
681.338	2	605	617	1360.66	1360.66	-1	2	W.SEGAAQSKGIDWL.N		50
681.338	2	605	617	1360.66	1360.66	-1	2	W.SEGAAQSKGIDWL.N		50
681.342	2	605	617	1360.67	1360.66	6	2	W.SEGAAQSKGIDWL.N		23
681.342	2	605	617	1360.67	1360.66	6	2	W.SEGAAQSKGIDWL.N		23
681.343	2	605	617	1360.67	1360.66	7	2	W.SEGAAQSKGIDWL.N		23
681.343	2	605	617	1360.67	1360.66	7	2	W.SEGAAQSKGIDWL.N		23
681.343	2	605	617	1360.67	1360.66	7	2	W.SEGAAQSKGIDWL.N		23
681.345	2	605	617	1360.68	1360.66	10	2	W.SEGAAQSKGIDWL.N		36
681.345	2	605	617	1360.68	1360.66	10	2	W.SEGAAQSKGIDWL.N		36
681.345	2	605	617	1360.68	1360.66	10	2	W.SEGAAQSKGIDWL.N		36
681.351	2	605	617	1360.69	1360.66	19	2	W.SEGAAQSKGIDWL.N		24
681.351	2	605	617	1360.69	1360.66	19	2	W.SEGAAQSKGIDWL.N		24
681.354	2	605	617	1360.69	1360.66	23	2	W.SEGAAQSKGIDWL.N		43
681.354	2	605	617	1360.69	1360.66	23	2	W.SEGAAQSKGIDWL.N		43
681.354	2	605	617	1360.69	1360.66	23	2	W.SEGAAQSKGIDWL.N		34
681.354	2	605	617	1360.69	1360.66	23	2	W.SEGAAQSKGIDWL.N		34
794.92	2	605	619	1587.83	1587.79	23	3	W.SEGAAQSKGIDWLNL.V		38
794.92	2	605	619	1587.83	1587.79	23	3	W.SEGAAQSKGIDWLNL.V		38
596.32	2	617	627	1190.62	1190.62	6	2	W.LNLVSPTDIGY.I		23
596.32	2	617	627	1190.62	1190.62	6	2	W.LNLVSPTDIGY.I		23
596.331	2	617	627	1190.65	1190.62	24	2	W.LNLVSPTDIGY.I		62
596.331	2	617	627	1190.65	1190.62	24	2	W.LNLVSPTDIGY.I		62
539.78	2	618	627	1077.54	1077.53	10	1	L.NLVSPTDIGY.I		28
539.78	2	618	627	1077.54	1077.53	10	1	L.NLVSPTDIGY.I		28
539.78	2	618	627	1077.54	1077.53	10	1	L.NLVSPTDIGY.I		28
539.78	2	618	627	1077.54	1077.53	10	1	L.NLVSPTDIGY.I		26
539.78	2	618	627	1077.54	1077.53	10	1	L.NLVSPTDIGY.I		26
539.78	2	618	627	1077.54	1077.53	10	1	L.NLVSPTDIGY.I		26
539.78	2	618	627	1077.54	1077.53	10	1	L.NLVSPTDIGY.I		36
539.78	2	618	627	1077.54	1077.53	10	1	L.NLVSPTDIGY.I		36
539.78	2	618	627	1077.54	1077.53	10	1	L.NLVSPTDIGY.I		36
539.781	2	618	627	1077.55	1077.53	13	1	L.NLVSPTDIGY.I		21
539.781	2	618	627	1077.55	1077.53	13	1	L.NLVSPTDIGY.I		21
539.788	2	618	627	1077.56	1077.53	25	1	L.NLVSPTDIGY.I		22
539.788	2	618	627	1077.56	1077.53	25	1	L.NLVSPTDIGY.I		22
532.278	2	657	666	1062.54	1062.53	7	1	L.VTPQEAKAGY.E		42
532.278	2	657	666	1062.54	1062.53	7	1	L.VTPQEAKAGY.E		42
532.28	2	657	666	1062.55	1062.53	11	1	L.VTPQEAKAGY.E		25
532.28	2	657	666	1062.55	1062.53	11	1	L.VTPQEAKAGY.E		25
532.281	2	657	666	1062.55	1062.53	12	1	L.VTPQEAKAGY.E		60
532.281	2	657	666	1062.55	1062.53	12	1	L.VTPQEAKAGY.E		60
532.281	2	657	666	1062.55	1062.53	12	1	L.VTPQEAKAGY.E		60
532.283	2	657	666	1062.55	1062.53	15	1	L.VTPQEAKAGY.E		52
532.283	2	657	666	1062.55	1062.53	15	1	L.VTPQEAKAGY.E		52
532.285	2	657	666	1062.56	1062.53	19	1	L.VTPQEAKAGY.E		23
532.285	2	657	666	1062.56	1062.53	19	1	L.VTPQEAKAGY.E		23
570.293	3	657	672	1707.86	1707.85	7	2	L.VTPQEAKAGYEAAINF.M		22
570.293	3	657	672	1707.86	1707.85	7	2	L.VTPQEAKAGYEAAINF.M		22
570.296	3	657	672	1707.87	1707.85	11	2	L.VTPQEAKAGYEAAINF.M		20
570.296	3	657	672	1707.87	1707.85	11	2	L.VTPQEAKAGYEAAINF.M		20
570.296	3	657	672	1707.87	1707.85	11	2	L.VTPQEAKAGYEAAINF.M		21
570.296	3	657	672	1707.87	1707.85	11	2	L.VTPQEAKAGYEAAINF.M		21
570.298	3	657	672	1707.87	1707.85	15	2	L.VTPQEAKAGYEAAINF.M		26
570.298	3	657	672	1707.87	1707.85	15	2	L.VTPQEAKAGYEAAINF.M		26
570.298	3	657	672	1707.87	1707.85	15	2	L.VTPQEAKAGYEAAINF.M		24
570.298	3	657	672	1707.87	1707.85	15	2	L.VTPQEAKAGYEAAINF.M		24
607.797	2	664	674	1213.58	1213.58	0	2	K.AGYEAAINFMK.T		69
607.802	2	664	674	1213.59	1213.58	7	2	K.AGYEAAINFMK.T		24
607.804	2	664	674	1213.59	1213.58	11	2	K.AGYEAAINFMK.T		42
607.807	2	664	674	1213.6	1213.58	15	2	K.AGYEAAINFMK.T		38
607.807	2	664	674	1213.6	1213.58	15	2	K.AGYEAAINFMK.T		36
607.837	2	664	674	1213.66	1213.58	65	2	K.AGYEAAINFMK.T		55
607.84	2	664	674	1213.66	1213.58	69	2	K.AGYEAAINFMK.T		26
615.798	2	664	674	1229.58	1229.58	5	2	K.AGYEAAINFMK.T	Oxidation (M)	36
615.8	2	664	674	1229.58	1229.58	8	2	K.AGYEAAINFMK.T	Oxidation (M)	25
615.801	2	664	674	1229.59	1229.58	9	2	K.AGYEAAINFMK.T	Oxidation (M)	51
615.806	2	664	674	1229.6	1229.58	19	2	K.AGYEAAINFMK.T	Oxidation (M)	42
615.808	2	664	674	1229.6	1229.58	22	2	K.AGYEAAINFMK.T	Oxidation (M)	58
615.813	2	664	674	1229.61	1229.58	29	2	K.AGYEAAINFMK.T	Oxidation (M)	40
615.827	2	664	674	1229.64	1229.58	52	2	K.AGYEAAINFMK.T	Oxidation (M)	42
615.832	2	664	674	1229.65	1229.58	61	2	K.AGYEAAINFMK.T	Oxidation (M)	47
615.835	2	664	674	1229.66	1229.58	66	2	K.AGYEAAINFMK.T	Oxidation (M)	46
481.731	2	677	686	961.448	961.451	-2	1	Y.GNGLIGDGPY.I		22
481.731	2	677	686	961.448	961.451	-2	1	Y.GNGLIGDGPY.I		22
481.731	2	677	686	961.448	961.451	-2	1	Y.GNGLIGDGPY.I		22
481.732	2	677	686	961.449	961.451	-1	1	Y.GNGLIGDGPY.I		39
481.732	2	677	686	961.449	961.451	-1	1	Y.GNGLIGDGPY.I		39
481.732	2	677	686	961.449	961.451	-1	1	Y.GNGLIGDGPY.I		39
481.733	2	677	686	961.452	961.451	1	1	Y.GNGLIGDGPY.I		25
481.733	2	677	686	961.452	961.451	1	1	Y.GNGLIGDGPY.I		25
481.737	2	677	686	961.459	961.451	9	1	Y.GNGLIGDGPY.I		27
481.737	2	677	686	961.459	961.451	9	1	Y.GNGLIGDGPY.I		27
481.737	2	677	686	961.459	961.451	9	1	Y.GNGLIGDGPY.I		27
481.737	2	677	686	961.459	961.451	9	1	Y.GNGLIGDGPY.I		31
481.737	2	677	686	961.459	961.451	9	1	Y.GNGLIGDGPY.I		31
481.737	2	677	686	961.459	961.451	9	1	Y.GNGLIGDGPY.I		22
481.737	2	677	686	961.459	961.451	9	1	Y.GNGLIGDGPY.I		22
481.737	2	677	686	961.459	961.451	9	1	Y.GNGLIGDGPY.I		22
481.737	2	677	686	961.459	961.451	9	1	Y.GNGLIGDGPY.I		37
481.737	2	677	686	961.459	961.451	9	1	Y.GNGLIGDGPY.I		37
481.737	2	677	686	961.459	961.451	9	1	Y.GNGLIGDGPY.I		37
481.739	2	677	686	961.463	961.451	13	1	Y.GNGLIGDGPY.I		34
481.739	2	677	686	961.463	961.451	13	1	Y.GNGLIGDGPY.I		34
481.741	2	677	686	961.467	961.451	17	1	Y.GNGLIGDGPY.I		26
481.741	2	677	686	961.467	961.451	17	1	Y.GNGLIGDGPY.I		26
481.741	2	677	686	961.467	961.451	17	1	Y.GNGLIGDGPY.I		33
481.741	2	677	686	961.467	961.451	17	1	Y.GNGLIGDGPY.I		33
594.823	2	677	688	1187.63	1187.62	10	2	Y.GNGLIGDGPYIL.V		38
594.823	2	677	688	1187.63	1187.62	10	2	Y.GNGLIGDGPYIL.V		38
301.193	2	687	691	600.371	600.364	12	1	Y.ILVAW.N		28
301.193	2	687	691	600.371	600.364	12	1	Y.ILVAW.N		28
301.193	2	687	691	600.372	600.364	14	1	Y.ILVAW.N		28
301.193	2	687	691	600.372	600.364	14	1	Y.ILVAW.N		28
301.193	2	687	691	600.372	600.364	14	1	Y.ILVAW.N		28
301.195	2	687	691	600.375	600.364	20	1	Y.ILVAW.N		31
301.195	2	687	691	600.375	600.364	20	1	Y.ILVAW.N		31
301.195	2	687	691	600.375	600.364	20	1	Y.ILVAW.N		31
301.199	2	687	691	600.384	600.364	33	1	Y.ILVAW.N		23
301.199	2	687	691	600.384	600.364	33	1	Y.ILVAW.N		23
707.865	2	687	699	1413.72	1413.73	-9	2	Y.ILVAWNPSASPPY.A		42
707.865	2	687	699	1413.72	1413.73	-9	2	Y.ILVAWNPSASPPY.A		42
707.865	2	687	699	1413.72	1413.73	-9	2	Y.ILVAWNPSASPPY.A		42
707.867	2	687	699	1413.72	1413.73	-6	2	Y.ILVAWNPSASPPY.A		32
707.867	2	687	699	1413.72	1413.73	-6	2	Y.ILVAWNPSASPPY.A		32
707.867	2	687	699	1413.72	1413.73	-6	2	Y.ILVAWNPSASPPY.A		32
707.868	2	687	699	1413.72	1413.73	-6	2	Y.ILVAWNPSASPPY.A		21
707.868	2	687	699	1413.72	1413.73	-6	2	Y.ILVAWNPSASPPY.A		21
707.868	2	687	699	1413.72	1413.73	-6	2	Y.ILVAWNPSASPPY.A		21
707.868	2	687	699	1413.72	1413.73	-6	2	Y.ILVAWNPSASPPY.A		21
707.868	2	687	699	1413.72	1413.73	-6	2	Y.ILVAWNPSASPPY.A		21
707.868	2	687	699	1413.72	1413.73	-6	2	Y.ILVAWNPSASPPY.A		21
707.868	2	687	699	1413.72	1413.73	-6	2	Y.ILVAWNPSASPPY.A		26
707.868	2	687	699	1413.72	1413.73	-6	2	Y.ILVAWNPSASPPY.A		26
707.868	2	687	699	1413.72	1413.73	-6	2	Y.ILVAWNPSASPPY.A		26
707.87	2	687	699	1413.73	1413.73	-3	2	Y.ILVAWNPSASPPY.A		24
707.87	2	687	699	1413.73	1413.73	-3	2	Y.ILVAWNPSASPPY.A		24
707.87	2	687	699	1413.73	1413.73	-3	2	Y.ILVAWNPSASPPY.A		24
707.87	2	687	699	1413.73	1413.73	-3	2	Y.ILVAWNPSASPPY.A		27
707.87	2	687	699	1413.73	1413.73	-3	2	Y.ILVAWNPSASPPY.A		27
707.87	2	687	699	1413.73	1413.73	-3	2	Y.ILVAWNPSASPPY.A		27
707.87	2	687	699	1413.73	1413.73	-2	2	Y.ILVAWNPSASPPY.A		28
707.87	2	687	699	1413.73	1413.73	-2	2	Y.ILVAWNPSASPPY.A		28
707.87	2	687	699	1413.73	1413.73	-2	2	Y.ILVAWNPSASPPY.A		28
707.871	2	687	699	1413.73	1413.73	-2	2	Y.ILVAWNPSASPPY.A		47
707.871	2	687	699	1413.73	1413.73	-2	2	Y.ILVAWNPSASPPY.A		47
707.871	2	687	699	1413.73	1413.73	-2	2	Y.ILVAWNPSASPPY.A		24
707.871	2	687	699	1413.73	1413.73	-2	2	Y.ILVAWNPSASPPY.A		24
707.871	2	687	699	1413.73	1413.73	-1	2	Y.ILVAWNPSASPPY.A		40
707.871	2	687	699	1413.73	1413.73	-1	2	Y.ILVAWNPSASPPY.A		40
707.873	2	687	699	1413.73	1413.73	1	2	Y.ILVAWNPSASPPY.A		27
707.873	2	687	699	1413.73	1413.73	1	2	Y.ILVAWNPSASPPY.A		27
707.873	2	687	699	1413.73	1413.73	1	2	Y.ILVAWNPSASPPY.A		27
707.873	2	687	699	1413.73	1413.73	2	2	Y.ILVAWNPSASPPY.A		25
707.873	2	687	699	1413.73	1413.73	2	2	Y.ILVAWNPSASPPY.A		25
707.873	2	687	699	1413.73	1413.73	2	2	Y.ILVAWNPSASPPY.A		25
707.873	2	687	699	1413.73	1413.73	2	2	Y.ILVAWNPSASPPY.A		29
707.873	2	687	699	1413.73	1413.73	2	2	Y.ILVAWNPSASPPY.A		29
707.873	2	687	699	1413.73	1413.73	2	2	Y.ILVAWNPSASPPY.A		30
707.873	2	687	699	1413.73	1413.73	2	2	Y.ILVAWNPSASPPY.A		30
707.873	2	687	699	1413.73	1413.73	2	2	Y.ILVAWNPSASPPY.A		34
707.873	2	687	699	1413.73	1413.73	2	2	Y.ILVAWNPSASPPY.A		34
707.873	2	687	699	1413.73	1413.73	2	2	Y.ILVAWNPSASPPY.A		21
707.873	2	687	699	1413.73	1413.73	2	2	Y.ILVAWNPSASPPY.A		21
707.876	2	687	699	1413.74	1413.73	6	2	Y.ILVAWNPSASPPY.A		24
707.876	2	687	699	1413.74	1413.73	6	2	Y.ILVAWNPSASPPY.A		24
707.876	2	687	699	1413.74	1413.73	6	2	Y.ILVAWNPSASPPY.A		26
707.876	2	687	699	1413.74	1413.73	6	2	Y.ILVAWNPSASPPY.A		26
707.876	2	687	699	1413.74	1413.73	6	2	Y.ILVAWNPSASPPY.A		26
707.876	2	687	699	1413.74	1413.73	6	2	Y.ILVAWNPSASPPY.A		20
707.876	2	687	699	1413.74	1413.73	6	2	Y.ILVAWNPSASPPY.A		20
707.876	2	687	699	1413.74	1413.73	6	2	Y.ILVAWNPSASPPY.A		20
707.876	2	687	699	1413.74	1413.73	6	2	Y.ILVAWNPSASPPY.A		25
707.876	2	687	699	1413.74	1413.73	6	2	Y.ILVAWNPSASPPY.A		25
707.879	2	687	699	1413.74	1413.73	9	2	Y.ILVAWNPSASPPY.A		35
707.879	2	687	699	1413.74	1413.73	9	2	Y.ILVAWNPSASPPY.A		35
707.879	2	687	699	1413.74	1413.73	9	2	Y.ILVAWNPSASPPY.A		35
707.879	2	687	699	1413.74	1413.73	9	2	Y.ILVAWNPSASPPY.A		39
707.879	2	687	699	1413.74	1413.73	9	2	Y.ILVAWNPSASPPY.A		39
707.879	2	687	699	1413.74	1413.73	9	2	Y.ILVAWNPSASPPY.A		39
707.879	2	687	699	1413.74	1413.73	9	2	Y.ILVAWNPSASPPY.A		27
707.879	2	687	699	1413.74	1413.73	9	2	Y.ILVAWNPSASPPY.A		27
707.879	2	687	699	1413.74	1413.73	9	2	Y.ILVAWNPSASPPY.A		27
707.879	2	687	699	1413.74	1413.73	9	2	Y.ILVAWNPSASPPY.A		41
707.879	2	687	699	1413.74	1413.73	9	2	Y.ILVAWNPSASPPY.A		41
707.881	2	687	699	1413.75	1413.73	12	2	Y.ILVAWNPSASPPY.A		47
707.881	2	687	699	1413.75	1413.73	12	2	Y.ILVAWNPSASPPY.A		47
707.881	2	687	699	1413.75	1413.73	12	2	Y.ILVAWNPSASPPY.A		47
707.881	2	687	699	1413.75	1413.73	13	2	Y.ILVAWNPSASPPY.A		33
707.881	2	687	699	1413.75	1413.73	13	2	Y.ILVAWNPSASPPY.A		33
707.881	2	687	699	1413.75	1413.73	13	2	Y.ILVAWNPSASPPY.A		33
707.881	2	687	699	1413.75	1413.73	13	2	Y.ILVAWNPSASPPY.A		36
707.881	2	687	699	1413.75	1413.73	13	2	Y.ILVAWNPSASPPY.A		36
707.881	2	687	699	1413.75	1413.73	13	2	Y.ILVAWNPSASPPY.A		36
707.881	2	687	699	1413.75	1413.73	13	2	Y.ILVAWNPSASPPY.A		31
707.881	2	687	699	1413.75	1413.73	13	2	Y.ILVAWNPSASPPY.A		31
707.881	2	687	699	1413.75	1413.73	13	2	Y.ILVAWNPSASPPY.A		38
707.881	2	687	699	1413.75	1413.73	13	2	Y.ILVAWNPSASPPY.A		38
807.439	2	687	701	1612.86	1612.86	1	3	Y.ILVAWNPSASPPYAK.L		63
807.448	2	687	701	1612.88	1612.86	12	3	Y.ILVAWNPSASPPYAK.L		51
807.45	2	687	701	1612.88	1612.86	14	3	Y.ILVAWNPSASPPYAK.L		31
594.79	2	689	699	1187.57	1187.56	4	1	L.VAWNPSASPPY.A		30
594.79	2	689	699	1187.57	1187.56	4	1	L.VAWNPSASPPY.A		30
594.79	2	689	699	1187.57	1187.56	4	1	L.VAWNPSASPPY.A		30
594.791	2	689	699	1187.57	1187.56	6	1	L.VAWNPSASPPY.A		27
594.791	2	689	699	1187.57	1187.56	6	1	L.VAWNPSASPPY.A		27
594.791	2	689	699	1187.57	1187.56	6	1	L.VAWNPSASPPY.A		27
594.794	2	689	699	1187.57	1187.56	10	1	L.VAWNPSASPPY.A		21
594.794	2	689	699	1187.57	1187.56	10	1	L.VAWNPSASPPY.A		21
594.794	2	689	699	1187.57	1187.56	10	1	L.VAWNPSASPPY.A		21
594.801	2	689	699	1187.59	1187.56	22	1	L.VAWNPSASPPY.A		46
594.801	2	689	699	1187.59	1187.56	22	1	L.VAWNPSASPPY.A		46
694.352	2	689	701	1386.69	1386.69	-2	2	L.VAWNPSASPPYAK.L		39
750.893	2	689	702	1499.77	1499.78	-4	3	L.VAWNPSASPPYAKL.I		56
750.893	2	689	702	1499.77	1499.78	-4	3	L.VAWNPSASPPYAKL.I		56
750.893	2	689	702	1499.77	1499.78	-4	3	L.VAWNPSASPPYAKL.I		56
750.895	2	689	702	1499.77	1499.78	-2	3	L.VAWNPSASPPYAKL.I		27
750.895	2	689	702	1499.77	1499.78	-2	3	L.VAWNPSASPPYAKL.I		27
750.897	2	689	702	1499.78	1499.78	2	3	L.VAWNPSASPPYAKL.I		34
750.897	2	689	702	1499.78	1499.78	2	3	L.VAWNPSASPPYAKL.I		34
750.901	2	689	702	1499.79	1499.78	7	3	L.VAWNPSASPPYAKL.I		47
750.901	2	689	702	1499.79	1499.78	7	3	L.VAWNPSASPPYAKL.I		47
750.901	2	689	702	1499.79	1499.78	7	3	L.VAWNPSASPPYAKL.I		47
750.902	2	689	702	1499.79	1499.78	8	3	L.VAWNPSASPPYAKL.I		46
750.902	2	689	702	1499.79	1499.78	8	3	L.VAWNPSASPPYAKL.I		46
750.902	2	689	702	1499.79	1499.78	8	3	L.VAWNPSASPPYAKL.I		46
416.697	2	692	699	831.38	831.376	4	0	W.NPSASPPY.A		20
416.697	2	692	699	831.38	831.376	4	0	W.NPSASPPY.A		20
416.701	2	692	699	831.387	831.376	13	0	W.NPSASPPY.A		21
416.701	2	692	699	831.387	831.376	13	0	W.NPSASPPY.A		21
572.799	2	692	702	1143.58	1143.59	-7	2	W.NPSASPPYAKL.I		38
572.799	2	692	702	1143.58	1143.59	-7	2	W.NPSASPPYAKL.I		38
572.799	2	692	702	1143.58	1143.59	-7	2	W.NPSASPPYAKL.I		38
572.801	2	692	702	1143.59	1143.59	-4	2	W.NPSASPPYAKL.I		21
572.801	2	692	702	1143.59	1143.59	-4	2	W.NPSASPPYAKL.I		21
572.802	2	692	702	1143.59	1143.59	-3	2	W.NPSASPPYAKL.I		23
572.802	2	692	702	1143.59	1143.59	-3	2	W.NPSASPPYAKL.I		23
572.802	2	692	702	1143.59	1143.59	-3	2	W.NPSASPPYAKL.I		23
572.802	2	692	702	1143.59	1143.59	-2	2	W.NPSASPPYAKL.I		55
572.802	2	692	702	1143.59	1143.59	-2	2	W.NPSASPPYAKL.I		55
572.803	2	692	702	1143.59	1143.59	0	2	W.NPSASPPYAKL.I		34
572.803	2	692	702	1143.59	1143.59	0	2	W.NPSASPPYAKL.I		34
572.804	2	692	702	1143.59	1143.59	2	2	W.NPSASPPYAKL.I		27
572.804	2	692	702	1143.59	1143.59	2	2	W.NPSASPPYAKL.I		27
572.807	2	692	702	1143.6	1143.59	6	2	W.NPSASPPYAKL.I		32
572.807	2	692	702	1143.6	1143.59	6	2	W.NPSASPPYAKL.I		32
572.807	2	692	702	1143.6	1143.59	6	2	W.NPSASPPYAKL.I		32
572.808	2	692	702	1143.6	1143.59	8	2	W.NPSASPPYAKL.I		35
572.808	2	692	702	1143.6	1143.59	8	2	W.NPSASPPYAKL.I		35
572.808	2	692	702	1143.6	1143.59	8	2	W.NPSASPPYAKL.I		39
572.808	2	692	702	1143.6	1143.59	8	2	W.NPSASPPYAKL.I		39
572.809	2	692	702	1143.6	1143.59	10	2	W.NPSASPPYAKL.I		47
572.809	2	692	702	1143.6	1143.59	10	2	W.NPSASPPYAKL.I		47
572.809	2	692	702	1143.6	1143.59	10	2	W.NPSASPPYAKL.I		47
572.811	2	692	702	1143.61	1143.59	14	2	W.NPSASPPYAKL.I		28
572.811	2	692	702	1143.61	1143.59	14	2	W.NPSASPPYAKL.I		28
572.811	2	692	702	1143.61	1143.59	14	2	W.NPSASPPYAKL.I		28
572.812	2	692	702	1143.61	1143.59	15	2	W.NPSASPPYAKL.I		34
572.812	2	692	702	1143.61	1143.59	15	2	W.NPSASPPYAKL.I		34
388.228	2	702	707	774.442	774.439	5	2	K.LIRNPY.F		29
388.228	2	702	707	774.442	774.439	5	2	K.LIRNPY.F		29
388.228	2	702	707	774.442	774.439	5	2	K.LIRNPY.F		29
461.763	2	702	708	921.512	921.507	5	3	K.LIRNPYF.H		22
331.686	2	703	707	661.358	661.355	5	1	L.IRNPY.F		23
331.686	2	703	707	661.358	661.355	5	1	L.IRNPY.F		23
331.686	2	703	707	661.358	661.355	5	1	L.IRNPY.F		23
331.686	2	703	707	661.358	661.355	5	1	L.IRNPY.F		21
331.686	2	703	707	661.358	661.355	5	1	L.IRNPY.F		21
331.686	2	703	707	661.358	661.355	5	1	L.IRNPY.F		21
331.688	2	703	707	661.361	661.355	10	1	L.IRNPY.F		23
331.688	2	703	707	661.361	661.355	10	1	L.IRNPY.F		23
331.688	2	703	707	661.361	661.355	10	1	L.IRNPY.F		23
331.688	2	703	707	661.361	661.355	10	1	L.IRNPY.F		24
331.688	2	703	707	661.361	661.355	10	1	L.IRNPY.F		24
331.69	2	703	707	661.365	661.355	15	1	L.IRNPY.F		26
331.69	2	703	707	661.365	661.355	15	1	L.IRNPY.F		26
331.691	2	703	707	661.368	661.355	20	1	L.IRNPY.F		22
331.691	2	703	707	661.368	661.355	20	1	L.IRNPY.F		22
331.691	2	703	707	661.368	661.355	20	1	L.IRNPY.F		21
331.691	2	703	707	661.368	661.355	20	1	L.IRNPY.F		21
331.691	2	703	707	661.368	661.355	20	1	L.IRNPY.F		27
331.691	2	703	707	661.368	661.355	20	1	L.IRNPY.F		27
331.691	2	703	707	661.368	661.355	20	1	L.IRNPY.F		27
331.691	2	703	707	661.368	661.355	20	1	L.IRNPY.F		27
331.691	2	703	707	661.368	661.355	20	1	L.IRNPY.F		27
331.691	2	703	707	661.368	661.355	20	1	L.IRNPY.F		27
331.691	2	703	707	661.368	661.355	20	1	L.IRNPY.F		25
331.691	2	703	707	661.368	661.355	20	1	L.IRNPY.F		25
331.691	2	703	707	661.368	661.355	20	1	L.IRNPY.F		24
331.691	2	703	707	661.368	661.355	20	1	L.IRNPY.F		24
331.691	2	703	707	661.368	661.355	20	1	L.IRNPY.F		25
331.691	2	703	707	661.368	661.355	20	1	L.IRNPY.F		25
331.691	2	703	707	661.368	661.355	20	1	L.IRNPY.F		22
331.691	2	703	707	661.368	661.355	20	1	L.IRNPY.F		22
331.691	2	703	707	661.368	661.355	20	1	L.IRNPY.F		22
331.691	2	703	707	661.368	661.355	20	1	L.IRNPY.F		22
331.691	2	703	707	661.368	661.355	20	1	L.IRNPY.F		20
331.691	2	703	707	661.368	661.355	20	1	L.IRNPY.F		20
331.692	2	703	707	661.369	661.355	21	1	L.IRNPY.F		24
331.692	2	703	707	661.369	661.355	21	1	L.IRNPY.F		24
331.692	2	703	707	661.369	661.355	21	1	L.IRNPY.F		24
331.693	2	703	707	661.371	661.355	25	1	L.IRNPY.F		27
331.693	2	703	707	661.371	661.355	25	1	L.IRNPY.F		27
331.693	2	703	707	661.371	661.355	25	1	L.IRNPY.F		27
331.693	2	703	707	661.371	661.355	25	1	L.IRNPY.F		27
331.693	2	703	707	661.371	661.355	25	1	L.IRNPY.F		27
331.693	2	703	707	661.371	661.355	25	1	L.IRNPY.F		27
331.693	2	703	707	661.371	661.355	25	1	L.IRNPY.F		22
331.693	2	703	707	661.371	661.355	25	1	L.IRNPY.F		22
331.693	2	703	707	661.371	661.355	25	1	L.IRNPY.F		22
331.693	2	703	707	661.371	661.355	25	1	L.IRNPY.F		22
405.221	2	703	708	808.428	808.423	6	2	L.IRNPYF.H		21
405.221	2	703	708	808.428	808.423	6	2	L.IRNPYF.H		21
405.221	2	703	708	808.428	808.423	6	2	L.IRNPYF.H		21
405.226	2	703	708	808.437	808.423	17	2	L.IRNPYF.H		22
405.226	2	703	708	808.437	808.423	17	2	L.IRNPYF.H		22
405.226	2	703	708	808.437	808.423	17	2	L.IRNPYF.H		31
405.226	2	703	708	808.437	808.423	17	2	L.IRNPYF.H		31
405.226	2	703	708	808.437	808.423	17	2	L.IRNPYF.H		32
405.226	2	703	708	808.437	808.423	17	2	L.IRNPYF.H		32
405.226	2	703	708	808.437	808.423	17	2	L.IRNPYF.H		20
405.226	2	703	708	808.437	808.423	17	2	L.IRNPYF.H		20
405.226	2	703	708	808.437	808.423	17	2	L.IRNPYF.H		32
405.226	2	703	708	808.437	808.423	17	2	L.IRNPYF.H		32
405.226	2	703	708	808.437	808.423	17	2	L.IRNPYF.H		32
405.226	2	703	708	808.437	808.423	17	2	L.IRNPYF.H		32
405.226	2	703	708	808.437	808.423	17	2	L.IRNPYF.H		25
405.226	2	703	708	808.437	808.423	17	2	L.IRNPYF.H		25
405.226	2	703	708	808.437	808.423	17	2	L.IRNPYF.H		25
405.226	2	703	708	808.437	808.423	17	2	L.IRNPYF.H		25
405.226	2	703	708	808.437	808.423	17	2	L.IRNPYF.H		29
405.226	2	703	708	808.437	808.423	17	2	L.IRNPYF.H		29
405.226	2	703	708	808.437	808.423	17	2	L.IRNPYF.H		30
405.226	2	703	708	808.437	808.423	17	2	L.IRNPYF.H		30
405.226	2	703	708	808.437	808.423	17	2	L.IRNPYF.H		30
405.226	2	703	708	808.437	808.423	17	2	L.IRNPYF.H		30
405.226	2	703	708	808.437	808.423	17	2	L.IRNPYF.H		33
405.226	2	703	708	808.437	808.423	17	2	L.IRNPYF.H		33
405.228	2	703	708	808.441	808.423	22	2	L.IRNPYF.H		32
405.228	2	703	708	808.441	808.423	22	2	L.IRNPYF.H		32
405.228	2	703	708	808.441	808.423	22	2	L.IRNPYF.H		28
405.228	2	703	708	808.441	808.423	22	2	L.IRNPYF.H		28
405.228	2	703	708	808.441	808.423	22	2	L.IRNPYF.H		29
405.228	2	703	708	808.441	808.423	22	2	L.IRNPYF.H		29
405.228	2	703	708	808.441	808.423	22	2	L.IRNPYF.H		30
405.228	2	703	708	808.441	808.423	22	2	L.IRNPYF.H		30
405.229	2	703	708	808.443	808.423	25	2	L.IRNPYF.H		32
405.23	2	703	708	808.445	808.423	27	2	L.IRNPYF.H		28
405.23	2	703	708	808.445	808.423	27	2	L.IRNPYF.H		28
405.23	2	703	708	808.445	808.423	27	2	L.IRNPYF.H		32
405.23	2	703	708	808.445	808.423	27	2	L.IRNPYF.H		32
405.23	2	703	708	808.445	808.423	27	2	L.IRNPYF.H		26
405.23	2	703	708	808.445	808.423	27	2	L.IRNPYF.H		26
734.883	2	705	717	1467.75	1467.75	0	3	R.NPYFHLVPPSNAL.A		22
547.784	2	708	717	1093.55	1093.59	-35	2	Y.FHLVPPSNAL.A		35
547.784	2	708	717	1093.55	1093.59	-35	2	Y.FHLVPPSNAL.A		35
547.802	2	708	717	1093.59	1093.59	-2	2	Y.FHLVPPSNAL.A		48
547.802	2	708	717	1093.59	1093.59	-2	2	Y.FHLVPPSNAL.A		48
547.802	2	708	717	1093.59	1093.59	-2	2	Y.FHLVPPSNAL.A		48
547.802	2	708	717	1093.59	1093.59	-2	2	Y.FHLVPPSNAL.A		45
547.802	2	708	717	1093.59	1093.59	-2	2	Y.FHLVPPSNAL.A		45
547.802	2	708	717	1093.59	1093.59	-2	2	Y.FHLVPPSNAL.A		45
547.802	2	708	717	1093.59	1093.59	-2	2	Y.FHLVPPSNAL.A		37
547.802	2	708	717	1093.59	1093.59	-2	2	Y.FHLVPPSNAL.A		37
547.802	2	708	717	1093.59	1093.59	-2	2	Y.FHLVPPSNAL.A		37
547.803	2	708	717	1093.59	1093.59	-1	2	Y.FHLVPPSNAL.A		51
547.803	2	708	717	1093.59	1093.59	-1	2	Y.FHLVPPSNAL.A		51
547.803	2	708	717	1093.59	1093.59	-1	2	Y.FHLVPPSNAL.A		51
547.803	2	708	717	1093.59	1093.59	-1	2	Y.FHLVPPSNAL.A		22
547.803	2	708	717	1093.59	1093.59	-1	2	Y.FHLVPPSNAL.A		22
547.803	2	708	717	1093.59	1093.59	-1	2	Y.FHLVPPSNAL.A		22
547.804	2	708	717	1093.59	1093.59	2	2	Y.FHLVPPSNAL.A		46
547.804	2	708	717	1093.59	1093.59	2	2	Y.FHLVPPSNAL.A		46
547.804	2	708	717	1093.59	1093.59	2	2	Y.FHLVPPSNAL.A		46
547.804	2	708	717	1093.59	1093.59	2	2	Y.FHLVPPSNAL.A		54
547.804	2	708	717	1093.59	1093.59	2	2	Y.FHLVPPSNAL.A		54
547.804	2	708	717	1093.59	1093.59	2	2	Y.FHLVPPSNAL.A		41
547.804	2	708	717	1093.59	1093.59	2	2	Y.FHLVPPSNAL.A		41
547.804	2	708	717	1093.59	1093.59	2	2	Y.FHLVPPSNAL.A		31
547.804	2	708	717	1093.59	1093.59	2	2	Y.FHLVPPSNAL.A		31
547.804	2	708	717	1093.59	1093.59	2	2	Y.FHLVPPSNAL.A		59
547.804	2	708	717	1093.59	1093.59	2	2	Y.FHLVPPSNAL.A		59
547.804	2	708	717	1093.59	1093.59	2	2	Y.FHLVPPSNAL.A		32
547.804	2	708	717	1093.59	1093.59	2	2	Y.FHLVPPSNAL.A		32
547.805	2	708	717	1093.59	1093.59	3	2	Y.FHLVPPSNAL.A		22
547.805	2	708	717	1093.59	1093.59	3	2	Y.FHLVPPSNAL.A		22
547.805	2	708	717	1093.59	1093.59	3	2	Y.FHLVPPSNAL.A		22
547.805	2	708	717	1093.59	1093.59	3	2	Y.FHLVPPSNAL.A		20
547.805	2	708	717	1093.59	1093.59	3	2	Y.FHLVPPSNAL.A		20
547.805	2	708	717	1093.59	1093.59	3	2	Y.FHLVPPSNAL.A		20
547.805	2	708	717	1093.6	1093.59	3	2	Y.FHLVPPSNAL.A		53
547.805	2	708	717	1093.6	1093.59	3	2	Y.FHLVPPSNAL.A		53
547.805	2	708	717	1093.6	1093.59	3	2	Y.FHLVPPSNAL.A		53
547.806	2	708	717	1093.6	1093.59	6	2	Y.FHLVPPSNAL.A		37
547.806	2	708	717	1093.6	1093.59	6	2	Y.FHLVPPSNAL.A		37
547.806	2	708	717	1093.6	1093.59	6	2	Y.FHLVPPSNAL.A		37
547.806	2	708	717	1093.6	1093.59	6	2	Y.FHLVPPSNAL.A		53
547.806	2	708	717	1093.6	1093.59	6	2	Y.FHLVPPSNAL.A		53
547.806	2	708	717	1093.6	1093.59	6	2	Y.FHLVPPSNAL.A		73
547.806	2	708	717	1093.6	1093.59	6	2	Y.FHLVPPSNAL.A		73
547.806	2	708	717	1093.6	1093.59	6	2	Y.FHLVPPSNAL.A		60
547.806	2	708	717	1093.6	1093.59	6	2	Y.FHLVPPSNAL.A		60
547.806	2	708	717	1093.6	1093.59	6	2	Y.FHLVPPSNAL.A		42
547.806	2	708	717	1093.6	1093.59	6	2	Y.FHLVPPSNAL.A		42
547.807	2	708	717	1093.6	1093.59	6	2	Y.FHLVPPSNAL.A		20
547.807	2	708	717	1093.6	1093.59	6	2	Y.FHLVPPSNAL.A		20
547.807	2	708	717	1093.6	1093.59	6	2	Y.FHLVPPSNAL.A		46
547.807	2	708	717	1093.6	1093.59	6	2	Y.FHLVPPSNAL.A		46
547.807	2	708	717	1093.6	1093.59	6	2	Y.FHLVPPSNAL.A		24
547.807	2	708	717	1093.6	1093.59	6	2	Y.FHLVPPSNAL.A		24
547.807	2	708	717	1093.6	1093.59	6	2	Y.FHLVPPSNAL.A		23
547.807	2	708	717	1093.6	1093.59	6	2	Y.FHLVPPSNAL.A		23
547.807	2	708	717	1093.6	1093.59	7	2	Y.FHLVPPSNAL.A		25
547.807	2	708	717	1093.6	1093.59	7	2	Y.FHLVPPSNAL.A		25
547.807	2	708	717	1093.6	1093.59	7	2	Y.FHLVPPSNAL.A		25
547.807	2	708	717	1093.6	1093.59	7	2	Y.FHLVPPSNAL.A		40
547.807	2	708	717	1093.6	1093.59	7	2	Y.FHLVPPSNAL.A		40
547.807	2	708	717	1093.6	1093.59	7	2	Y.FHLVPPSNAL.A		40
547.807	2	708	717	1093.6	1093.59	7	2	Y.FHLVPPSNAL.A		51
547.807	2	708	717	1093.6	1093.59	7	2	Y.FHLVPPSNAL.A		51
547.807	2	708	717	1093.6	1093.59	7	2	Y.FHLVPPSNAL.A		51
547.809	2	708	717	1093.6	1093.59	10	2	Y.FHLVPPSNAL.A		64
547.809	2	708	717	1093.6	1093.59	10	2	Y.FHLVPPSNAL.A		64
547.809	2	708	717	1093.6	1093.59	10	2	Y.FHLVPPSNAL.A		53
547.809	2	708	717	1093.6	1093.59	10	2	Y.FHLVPPSNAL.A		53
547.809	2	708	717	1093.6	1093.59	10	2	Y.FHLVPPSNAL.A		48
547.809	2	708	717	1093.6	1093.59	10	2	Y.FHLVPPSNAL.A		48
547.809	2	708	717	1093.6	1093.59	10	2	Y.FHLVPPSNAL.A		49
547.809	2	708	717	1093.6	1093.59	10	2	Y.FHLVPPSNAL.A		49
547.809	2	708	717	1093.6	1093.59	10	2	Y.FHLVPPSNAL.A		35
547.809	2	708	717	1093.6	1093.59	10	2	Y.FHLVPPSNAL.A		35
547.809	2	708	717	1093.6	1093.59	10	2	Y.FHLVPPSNAL.A		49
547.809	2	708	717	1093.6	1093.59	10	2	Y.FHLVPPSNAL.A		49
547.809	2	708	717	1093.6	1093.59	10	2	Y.FHLVPPSNAL.A		27
547.809	2	708	717	1093.6	1093.59	10	2	Y.FHLVPPSNAL.A		27
547.809	2	708	717	1093.6	1093.59	10	2	Y.FHLVPPSNAL.A		39
547.809	2	708	717	1093.6	1093.59	10	2	Y.FHLVPPSNAL.A		39
547.809	2	708	717	1093.6	1093.59	10	2	Y.FHLVPPSNAL.A		48
547.809	2	708	717	1093.6	1093.59	10	2	Y.FHLVPPSNAL.A		48
547.809	2	708	717	1093.6	1093.59	10	2	Y.FHLVPPSNAL.A		28
547.809	2	708	717	1093.6	1093.59	10	2	Y.FHLVPPSNAL.A		28
547.809	2	708	717	1093.6	1093.59	10	2	Y.FHLVPPSNAL.A		60
547.809	2	708	717	1093.6	1093.59	10	2	Y.FHLVPPSNAL.A		60
547.809	2	708	717	1093.6	1093.59	11	2	Y.FHLVPPSNAL.A		27
547.809	2	708	717	1093.6	1093.59	11	2	Y.FHLVPPSNAL.A		27
547.809	2	708	717	1093.6	1093.59	11	2	Y.FHLVPPSNAL.A		27
547.809	2	708	717	1093.6	1093.59	11	2	Y.FHLVPPSNAL.A		51
547.809	2	708	717	1093.6	1093.59	11	2	Y.FHLVPPSNAL.A		51
547.809	2	708	717	1093.6	1093.59	11	2	Y.FHLVPPSNAL.A		51
547.809	2	708	717	1093.6	1093.59	11	2	Y.FHLVPPSNAL.A		47
547.809	2	708	717	1093.6	1093.59	11	2	Y.FHLVPPSNAL.A		47
547.809	2	708	717	1093.6	1093.59	11	2	Y.FHLVPPSNAL.A		47
547.809	2	708	717	1093.6	1093.59	11	2	Y.FHLVPPSNAL.A		32
547.809	2	708	717	1093.6	1093.59	11	2	Y.FHLVPPSNAL.A		32
547.809	2	708	717	1093.6	1093.59	11	2	Y.FHLVPPSNAL.A		32
547.809	2	708	717	1093.6	1093.59	11	2	Y.FHLVPPSNAL.A		56
547.809	2	708	717	1093.6	1093.59	11	2	Y.FHLVPPSNAL.A		56
547.809	2	708	717	1093.6	1093.59	11	2	Y.FHLVPPSNAL.A		56
547.811	2	708	717	1093.61	1093.59	14	2	Y.FHLVPPSNAL.A		33
547.811	2	708	717	1093.61	1093.59	14	2	Y.FHLVPPSNAL.A		33
547.811	2	708	717	1093.61	1093.59	14	2	Y.FHLVPPSNAL.A		30
547.811	2	708	717	1093.61	1093.59	14	2	Y.FHLVPPSNAL.A		30
547.811	2	708	717	1093.61	1093.59	14	2	Y.FHLVPPSNAL.A		27
547.811	2	708	717	1093.61	1093.59	14	2	Y.FHLVPPSNAL.A		27
547.811	2	708	717	1093.61	1093.59	14	2	Y.FHLVPPSNAL.A		40
547.811	2	708	717	1093.61	1093.59	14	2	Y.FHLVPPSNAL.A		40
547.811	2	708	717	1093.61	1093.59	14	2	Y.FHLVPPSNAL.A		42
547.811	2	708	717	1093.61	1093.59	14	2	Y.FHLVPPSNAL.A		42
547.812	2	708	717	1093.61	1093.59	15	2	Y.FHLVPPSNAL.A		24
547.812	2	708	717	1093.61	1093.59	15	2	Y.FHLVPPSNAL.A		24
547.812	2	708	717	1093.61	1093.59	15	2	Y.FHLVPPSNAL.A		24
547.812	2	708	717	1093.61	1093.59	15	2	Y.FHLVPPSNAL.A		35
547.812	2	708	717	1093.61	1093.59	15	2	Y.FHLVPPSNAL.A		35
547.812	2	708	717	1093.61	1093.59	15	2	Y.FHLVPPSNAL.A		35
547.812	2	708	717	1093.61	1093.59	15	2	Y.FHLVPPSNAL.A		23
547.812	2	708	717	1093.61	1093.59	15	2	Y.FHLVPPSNAL.A		23
547.812	2	708	717	1093.61	1093.59	15	2	Y.FHLVPPSNAL.A		23
547.812	2	708	717	1093.61	1093.59	15	2	Y.FHLVPPSNAL.A		51
547.812	2	708	717	1093.61	1093.59	15	2	Y.FHLVPPSNAL.A		51
547.812	2	708	717	1093.61	1093.59	15	2	Y.FHLVPPSNAL.A		51
547.814	2	708	717	1093.61	1093.59	19	2	Y.FHLVPPSNAL.A		25
547.814	2	708	717	1093.61	1093.59	19	2	Y.FHLVPPSNAL.A		25
547.814	2	708	717	1093.61	1093.59	19	2	Y.FHLVPPSNAL.A		25
547.814	2	708	717	1093.61	1093.59	19	2	Y.FHLVPPSNAL.A		23
547.814	2	708	717	1093.61	1093.59	19	2	Y.FHLVPPSNAL.A		23
547.814	2	708	717	1093.61	1093.59	19	2	Y.FHLVPPSNAL.A		23
547.815	2	708	717	1093.62	1093.59	22	2	Y.FHLVPPSNAL.A		51
547.815	2	708	717	1093.62	1093.59	22	2	Y.FHLVPPSNAL.A		51
547.817	2	708	717	1093.62	1093.59	26	2	Y.FHLVPPSNAL.A		41
547.817	2	708	717	1093.62	1093.59	26	2	Y.FHLVPPSNAL.A		41
474.259	2	709	717	946.503	946.524	-22	1	F.HLVPPSNAL.A		24
474.259	2	709	717	946.503	946.524	-22	1	F.HLVPPSNAL.A		24
474.267	2	709	717	946.519	946.524	-5	1	F.HLVPPSNAL.A		28
474.267	2	709	717	946.519	946.524	-5	1	F.HLVPPSNAL.A		28
474.271	2	709	717	946.527	946.524	4	1	F.HLVPPSNAL.A		56
474.271	2	709	717	946.527	946.524	4	1	F.HLVPPSNAL.A		56
474.275	2	709	717	946.535	946.524	12	1	F.HLVPPSNAL.A		42
474.275	2	709	717	946.535	946.524	12	1	F.HLVPPSNAL.A		42
474.275	2	709	717	946.535	946.524	12	1	F.HLVPPSNAL.A		42
474.275	2	709	717	946.535	946.524	12	1	F.HLVPPSNAL.A		38
474.275	2	709	717	946.535	946.524	12	1	F.HLVPPSNAL.A		38
474.275	2	709	717	946.535	946.524	12	1	F.HLVPPSNAL.A		42
474.275	2	709	717	946.535	946.524	12	1	F.HLVPPSNAL.A		42
474.275	2	709	717	946.535	946.524	12	1	F.HLVPPSNAL.A		33
474.275	2	709	717	946.535	946.524	12	1	F.HLVPPSNAL.A		33
474.275	2	709	717	946.535	946.524	12	1	F.HLVPPSNAL.A		33
474.278	2	709	717	946.541	946.524	18	1	F.HLVPPSNAL.A		36
474.278	2	709	717	946.541	946.524	18	1	F.HLVPPSNAL.A		36
474.28	2	709	717	946.545	946.524	22	1	F.HLVPPSNAL.A		36
474.28	2	709	717	946.545	946.524	22	1	F.HLVPPSNAL.A		36
474.284	2	709	717	946.553	946.524	31	1	F.HLVPPSNAL.A		39
474.284	2	709	717	946.553	946.524	31	1	F.HLVPPSNAL.A		39
474.286	2	709	717	946.558	946.524	36	1	F.HLVPPSNAL.A		31
474.286	2	709	717	946.558	946.524	36	1	F.HLVPPSNAL.A		31
474.286	2	709	717	946.558	946.524	36	1	F.HLVPPSNAL.A		31
474.293	2	709	717	946.572	946.524	52	1	F.HLVPPSNAL.A		30
474.293	2	709	717	946.572	946.524	52	1	F.HLVPPSNAL.A		30
474.293	2	709	717	946.572	946.524	52	1	F.HLVPPSNAL.A		30
356.177	2	718	723	710.34	710.331	12	0	L.ALPTMY.S	Oxidation (M)	29
356.177	2	718	723	710.34	710.331	12	0	L.ALPTMY.S	Oxidation (M)	29

## Sheet: Glycopeptides
Supplementary Table 2B: List of glycopeptides identified in the SSO1273 protein cleaved by Chymotrypsin/Trypsin (merged results of three independent nano-RP-HPLC-ESI-MS/MS experiments)
m/z measured	z	Mw glycopeptide (exp)	Mw-1 glycan	Mw-2 glycan	Peptide Start	Peptide End	Mw peptide (calc)	Error (ppm)	Site of N-Glycosylation	Enzime specificity*	Note*
843.03	3	2526.07	1245.68	-34.7034	93	103	1245.66	-16	N100	C
897.38	3	2689.12	1408.73	128.347	92	103	1408.72	-4	N100	C
920.45	6	5516.65	4236.27	2955.88	66	103	4236.13	-32	N100	C
965.41	3	2893.21	1612.82	332.437	92	105	1612.81	-4	N100	C
965.41	3	2893.21	1612.82	332.437	92	105	1612.81	-4	N100	C
1030.45	3	3088.33	1807.94	527.557	93	108	1807.94	-14	N100	C
1131.16	3	3390.46	2110.07	829.687	86	103	2110.1	14	N100	C
1162.96	2	2323.9	1043.52	-236.866	100	108	1043.47	-47	N100	C
1195.49	2	2388.96	1108.58	-171.806	96	105	1108.56	-22	N100	C
1244.59	4	4974.33	3693.94	2413.56	84	114	3693.85	-24	N100	T
1264.02	2	2526.02	1245.64	-34.7456	93	103	1245.64	16	N100	C
1380.14	4	5516.53	4236.14	2955.76	66	103	4236.13	-1	N100	C
797.36	3	2389.06	1108.67	-171.713	115	123	1108.6	21	N122	T
1023.41	2	2044.8	764.419	-515.966	120	125	764.42	-3	N122	C
1026.44	3	3076.3	1795.91	515.527	120	134	1795.93	9	N122	C
1026.45	3	3076.33	1795.94	515.557	120	134	1795.93	-8	N122	C
1096.94	2	2191.86	911.479	-368.906	120	126	911.49	7	N122	C
1096.94	2	2191.86	911.479	-368.906	120	126	911.49	7	N122	C
1195.51	2	2389	1108.62	-171.766	115	123	1108.6	21	N122	T
1168.73	4	4670.89	3390.5	2110.12	158	174	2109.98	-67	N164 and N169	T
1148.15	3	3441.43	2161.04	880.657	152	169	2161.02	-8	N164 or N169	C	semispecific
1266.13	3	3795.37	2514.98	1234.6	164	173	1234.55	-40	N164 and N169	C
837.99	3	2510.95	1230.56	-49.8234	243	253	1230.59	23	N247	C	semispecific
1114.9	2	2227.78	947.399	-332.986	242	250	947.4	-2	N247	C
1114.92	2	2227.82	947.439	-332.946	242	250	947.4	-44	N247	C
826.67	3	2476.99	1196.6	-83.7834	294	303	1196.57	-27	N294	C
886.68	3	2657.02	1376.63	96.2466	287	298	1376.6	-20	N294	C
1063.09	3	3186.25	1905.86	625.477	287	303	1905.88	9	N294	C
1086.79	3	3257.35	1976.96	696.577	289	305	1976.95	-4	N294	CT
1143.49	3	3427.45	2147.06	866.677	287	305	2147.06	-1	N294	CT
1153.49	3	3457.45	2177.06	896.677	289	307	2177.03	-13	N294	C	semispecific
1239.48	2	2476.94	1196.56	-83.8256	294	303	1196.57	6	N294	C
1239.48	2	2476.94	1196.56	-83.8256	294	303	1196.57	6	N294	C
664.61	3	1990.81	710.422	-569.963	294	303	1196.57	-4	N294-3Hex	C
772.64	3	2314.9	1034.51	-245.873	294	303	1196.57	4	N294-Hex	C
857.39	4	3425.53	2145.14	864.759	304	322	2145.13	-4	N312	C
857.39	4	3425.53	2145.14	864.759	304	322	2145.13	-4	N312	C
877.05	3	2628.13	1347.74	67.3566	311	322	1347.7	-27	N312	C
989.72	4	3954.85	2674.46	1394.08	299	322	2674.41	2	N312	C
1049.13	3	3144.37	1863.98	583.597	311	327	1863.92	-31	N312	C	semispecific
1056.78	3	3167.32	1886.93	606.547	299	315	1886.98	28	N312	C
1063.11	3	3186.31	1905.92	625.537	287	303	1905.88	-22	N312	C
1088.84	3	3263.48	1983.1	702.715	303	320	1983.09	-6	N312	C	semispecific
1142.84	3	3425.5	2145.11	864.727	304	322	2145.13	10	N312	C
1142.85	3	3425.51	2145.13	864.742	304	322	2145.13	1	N312	C
1169.28	4	4673.09	3392.7	2112.32	306	334	3392.64	-17	N312	T
1180.54	3	3538.6	2258.21	977.827	303	322	2258.22	3	N312	C
1319.27	3	3954.79	2674.4	1394.02	299	322	2674.41	2	N312	C
1713.77	2	3425.52	2145.14	864.754	304	322	2145.13	-4	N312	C
769.02	3	2304.04	1023.65	-256.733	311	322	1347.7	42	N312-2Hex	C
884.38	3	2650.12	1369.73	89.3466	311	322	1347.7	31	N312+Na	C
1070.44	3	3208.3	1927.91	647.527	287	303	1905.88	21	N312+Na	C
843.36	3	2527.06	1246.67	-33.7134	339	350	1246.64	-14	N341	C	semispecific
1049.13	3	3144.37	1863.98	583.597	340	356	1864	8	N341	C	semispecific
1049.14	3	3144.4	1864.01	583.627	340	356	1864	-8	N341	C	semispecific
1068.18	3	3201.52	1921.13	640.747	339	356	1921.02	-59	N341	C
892	3	2672.98	1392.59	112.207	377	388	1392.62	21	N384	C	semispecific
976.92	4	3903.65	2623.26	1342.88	377	399	2623.29	12	N384	C	semispecific
1302.24	3	3903.7	2623.31	1342.93	377	399	2623.29	-7	N384	C	semispecific
1488.91	3	4463.71	3183.32	1902.94	380	396	1902.95	6	N384, N389	C
691.95	3	2072.83	792.442	-487.943	443	449	792.45	12	N445	T	semispecific
734.65	3	2200.93	920.542	-359.843	442	449	920.54	5	N445	C	semispecific
734.66	3	2200.96	920.572	-359.813	442	449	920.54	-28	N445	CT	semispecific
898.17	4	3588.65	2308.26	1027.88	440	460	2308.26	-1	N445	CT
1037.43	2	2072.84	792.459	-487.926	443	449	792.45	-13	N445	CT
1099.52	4	4394.05	3113.66	1833.28	443	470	3113.67	2	N445	CT
1099.56	4	4394.21	3113.82	1833.44	442	470	3113.67	-49	N445	T
1101.47	2	2200.92	920.539	-359.846	442	449	920.54	5	N445	C	semispecific
1109.18	3	3324.52	2044.13	763.747	442	460	2044.15	8	N445	C
1109.19	3	3324.55	2044.16	763.777	442	460	2044.15	-6	N445	C
1197.23	3	3588.67	2308.28	1027.9	440	460	2308.26	-10	N445	C
1663.28	2	3324.54	2044.16	763.774	442	460	2044.15	-6	N445	C
741.98	3	2222.92	942.532	-337.853	442	449	920.54	0	N445+Na	C	semispecific
680.65	3	2038.93	758.542	-521.843	442	449	920.54	61	N445-Hex	C	semispecific
626.6	3	1876.78	596.392	-683.993	442	449	920.54	-50	N445-2Hex	C	semispecific
935.06	3	2802.16	1521.77	241.387	472	485	1521.75	-13	N474	C	semispecific
968.94	4	3871.73	2591.34	1310.96	461	483	2591.31	-13	N474	C
1049.13	3	3144.37	1863.98	583.597	467	483	1863.98	-2	N474	C	semispecific
1049.13	3	3144.37	1863.98	583.597	462	483	1863.98	-2	N474	C
1142.82	3	3425.44	2145.05	864.667	461	479	2145.01	1	N474	C	semispecific
1291.57	3	3871.69	2591.3	1310.92	461	483	2591.31	2	N474	C
1291.58	3	3871.72	2591.33	1310.95	461	483	2591.31	-10	N474	C
873.64	4	3490.53	2210.14	929.759	489	507	2210.06	-34	N499	C
934.89	2	1867.76	587.379	-693.006	498	502	587.36	-27	N499	C	semispecific
1000.7	4	3998.77	2718.38	1438	484	507	2718.37	-5	N499	C
1073.72	4	4290.87	3010.48	1730.1	484	509	3010.47	-3	N499	C
1231.3	4	4921.17	3640.78	2360.4	484	515	3640.78	-1	N499	C	semispecific
1333.92	3	3998.74	2718.35	1437.97	484	507	2718.37	6	N499	C
1029.08	3	3084.21	1803.83	523.444	516	532	1803.82	-8	N518	C	semispecific
1122.78	3	3365.32	2084.93	804.547	510	529	2084.96	13	N518	C	semispecific
1130.11	3	3387.31	2106.92	826.537	510	529	2084.96	-15	N518+Na	C	semispecific
901.08	3	2700.22	1419.83	139.447	542	553	1419.78	-38	N546	C	semispecific
1009.43	3	3025.27	1744.88	464.497	543	557	1744.88	-1	N546	C
1009.44	3	3025.3	1744.91	464.527	543	557	1744.88	-18	N546	C
1095.5	4	4377.97	3097.58	1817.2	543	569	3097.54	-12	N546	C
1114.52	3	3340.54	2060.15	779.767	536	553	2060.17	8	N546	C	semispecific
786.32	3	2355.94	1075.55	-204.833	628	638	1075.55	1	N634	C	semispecific
839.68	3	2516.02	1235.63	-44.7534	633	644	1235.61	-12	N634	C	semispecific
859.69	3	2576.05	1295.66	15.2766	628	640	1295.64	-19	N634	C
859.7	3	2576.08	1295.69	15.3066	628	640	1295.64	-42	N634	C
920.449	6	5516.65	4236.26	2955.88	605	645	4236.16	4	N634	C
1009.08	3	3024.21	1743.83	463.441	624	640	1743.83	1	N634	C	semispecific
1039.13	3	3114.37	1833.98	553.597	628	645	1833.98	2	N634	C
1039.15	3	3114.43	1834.04	553.657	628	645	1833.98	-31	N634	C
1044.48	4	4173.89	2893.5	1613.12	618	645	2893.51	3	N634	C
1140.53	4	4558.09	3277.7	1997.32	613	643	3277.69	-4	N634	T
1245.56	4	4978.21	3697.82	2417.44	605	640	3697.81	-2	N634	C
1380.14	4	5516.53	4236.14	2955.76	605	645	4236.16	4	N634	C
1046.48	3	3136.42	1856.03	575.647	628	645	1833.98	33	N634+Na	C
751.65	3	2251.93	971.542	-308.843	646	654	971.53	-12	N650	C
823.04	3	2466.1	1185.71	-94.6734	646	656	1185.66	-42	N650	C
855.9	4	3419.57	2139.18	858.799	644	663	2139.18	4	N650	T
1002.47	3	3004.39	1724	443.617	641	656	1724.01	5	N650	C
1002.48	3	3004.42	1724.03	443.647	641	656	1724.01	-13	N650	C
1013.24	4	4048.93	2768.54	1488.16	641	666	2768.53	-3	N650	C
1140.55	4	4558.17	3277.78	1997.4	613	643	3277.69	-28	N650	T
1140.86	3	3419.56	2139.17	858.787	644	663	2139.18	-1	N650	T
1140.89	3	3419.65	2139.26	858.877	644	663	2139.18	-38	N650	T
1154.81	4	4615.21	3334.82	2054.44	644	674	3334.75	-22	N650	T
1171.21	3	3510.61	2230.22	949.837	646	666	2230.18	-38	N650	C
1174.56	4	4694.21	3413.82	2133.44	641	672	3413.84	7	N650	C
1234.03	2	2466.04	1185.66	-94.7256	646	656	1185.66	0	N650	C
1178.54	3	3532.6	2252.21	971.827	646	666	2230.18	18	N650+Na	C
940.4	3	2818.18	1537.79	257.407	763	776	1537.8	8	N769	C	semispecific
942.06	3	2823.16	1542.77	262.387	767	780	1524.74	-20	N769	C	semispecific
1009.08	3	3024.21	1743.83	463.441	777	792	1743.81	-9	N781	C	semispecific
1039.4	2	2076.78	796.399	-483.986	806	812	796.4	-4	N808	C	semispecific
*C-chymotrypsin (low specificity ), T-trypsin, semi-specific cleavage is indicated when only one end of a peptide matches the cleavage specificity
